# Supplementary material
Source: publisher site journal article supplement (https://www.spandidos-publications.com/2605/downloadSupplementary)
Supplement: Supplementary file 2 [file downloadSupplementary]

## Sheet: Table SIV
Table SIV. Predicted miR150 target genes from the different web tools.
Predicted miR150 target genes					Shared genes
microRNA	miRTarBase	mmmRNA	miRGate	miRDB
MYB	MYLK3	MBD6	MMP14	SOGA1	ADIPOR2
C13orf34	EIF2B2	MYB	FAM129B	GCFC2	AHI1
NRCAM	WDR26	ESAM	VWCE	ZNHIT6	AMOTL2
ADIPOR2	PARD6G	CNPPD1	CDK10	RAD23B	BTLA
PDCD4	INTS7	IGFBP2	RGPD6	ASTN2	EGR2
SDCCAG1	MYB	FOXD3	ARIH2OS	CDK12	ELK1
ACADM	MYO1F	BASP1	CDC7	ELAVL1	EREG
AKAP9	CXCR4	ZBTB4	NUCKS1	TTC7B	EZH2
FAM35B2	ZNF426	CAST	ABHD4	PDE4A	GOSR1
MTCH2	NSUN4	TMEM229B	ABI1	USP49	KLHL21
CAMSAP1	FOXK1	ELMOD3	CNGA3	MBTD1	LRRC1
MRPL9	EPHB2	SMC3	EGFL6	COMMD10	LTBP2
PHACTR1	PXMP4	EPB41L5	DGKE	DVL3	MBD6
LOC100147773	MSH3	DCAF6	DGKG	CTNNB1	MTMR9
FAM35B	CCNE1	ECE2	PYCR2	TMEM209	MUC4
ING4	AGA	RORB	PYCRL	DIXDC1	MYB
SFRS12	ATP13A3	TMEM150A	IGHMBP2	ZMAT2	NOTCH3
PPARGC1A	TRIM72	STOX1	ORC6	CTSC	PDCD4
HDAC8	N4BP2L2	ZEB1	P4HA2	SLC25A21	PDIA6
NFE2L2	IGF2	GLI1	CMTM7	ADAM12	PLXDC1
DCAF6	BIRC5	ADAM19	CNDP2	RYBP	QSOX1
ATAD2B	STXBP5L	MAMDC2	CNEP1R1	THAP8	RFK
C1orf144	CBL	ETF1	AC135178.1	PLAG1	RNF165
ARF4	SIGLEC11	IRAK2	STX1A	STOX1	SGTB
PPP1R8	VEGFA	ATP6V1H	GATAD2B	EIF5	SLC7A11
NEUROD6	ADIPOR2	UBFD1	LEPROT	MRPL35	SP1
DGCR10	ATP2B1	UBE2R2	B3GALT2	ARHGEF28	TRPS1
WDR67	CD46	PPP1R8	B3GALT6	CRAMP1L	XPNPEP3
IFIT5	QSOX1	MTCH2	BCR	PTGFR	ZEB1
SETD7	FOXRED2	ELOVL3	CDCA5	MAFB	ZNF347
VEZF1	YPEL1	SGMS1	WFDC5	ZDHHC21	ZNF460
HOXA2	MED16	IL7	KPNB1	SLC20A1
CCDC45	ZNF207	AHI1	FFAR3	CHMP4C
SMARCD2	CREBZF	GGNBP2	POGK	ACKR4
TMTC3	CNPPD1	TRPS1	LENG8	ERMAP
ENSA	HIP1	SNAPC2	42983	SH3GLB1
SMC3	TCEANC2	IRF2BP2	C15ORF52	ZNF521
C2orf39	PHAX	MBTD1	KIAA0319L	BMP6
CAST	ESR2	TADA1	LARP7	AMMECR1
AHI1	TRIM35	EPHB2	LASP1	CDK13
ACO1	CNST	NKX2-4	RABEP2	AKAP10
IL7	TTC31	FRAT2	RABIF	IL18R1
GLI1	CAST	HSP90B1	RABL3	UCHL5
ZHX2	AIFM2	ZSWIM6	AL645728.1	PTGIS
EPB41L5	C16orf63	C2CD2L	TMEM57	PTPRN
GABRB1	COL4A4	C7orf68	CBX5	PPP2R2A
FLJ40330	SPIC	MACF1	S100A8	UGT1A3
SCD5	CISH	ENSA	LAX1	ELK1
RPL23AP82	CCR6	TP53	FBXO25	SPAG9
RASSF8	WWC1	RPL23AP82	GDPD1	TNRC6A
ZSWIM6	MS4A3	SCD5	PPP2R4	USP3
SGMS1	DHX33	CACNA1G	SLC15A2	CYP20A1
CLDND1	MMAB	SP5	SNTB2	ARHGEF2
C12orf68	GATAD2B	PPP1R13L	SNTG1	C5orf58
TMPRSS11A	C2CD4B	GLE1	FAM150A	ZNF711
LOC100128081	AGTPBP1	WTAP	FAM153A	BANF1
HEXB	DGCR6L	ZNF335	TTC22	NLK
BAT2	ZBTB7A	TMPRSS11A	TTC26	SLC38A2
ADAM19	ABCB7	HRASLS	TTC28	DLX6
SV2B	MRS2	ADIPOR2	TTC31	MMAA
FOXD3	DENND4C	EGR2	EDNRA	TSPYL4
FBXL5	C4orf29	PHF8	OR7D2	KRR1
ATP6V1H	ACSL6	DCPS	LOXL3	TAB3
AMY2B	TIMM50	FBXL5	POTEI	MTMR9
RBMXL2	S1PR1	ATAD2B	POTEM	SHC4
IPO5	SP1	APC	POU2AF1	KITLG
CCDC36	PRKAB1	CALCR	LECT2	ISCA2
CDCA4	BMP8B	RBMXL2	KIAA0141	WDR5B
IGSF1	GOLGA2	C5orf58	KIAA0146	C17orf100
EPAS1	IP6K2	RANBP9	KBTBD6	BCL9L
C16orf63	BTLA	NEUROD6	TMEM235	CRH
PDE4DIP	CENPC1P1	PDE4DIP	RGS6	EGR2
C5orf58	UBOX5	RTP2	STK39	PERP
MAMDC2	EMP2	SUV420H2	PHTF2	FOPNL
RGNEF	SH3BP5	CDX1	C17ORF100	GABRA1
CTNNB1	GAN	CDCA4	CXCR7	TLDC1
CASD1	SLC25A37	GLIS3	MORN3	FARP1
SEMA3A	AHI1	TAF5L	NWD1	HEY2
NLK	ISCA2	HSCB	NXN	LY75-CD302
CLVS1	2017-09-14	GPR98	NXNL2	MYO5A
PHF3	A1CF	SLITRK2	COX19	ZBTB33
PSEN1	BCAS4	COG7	TET2	ZNF268
KCND1	MLN	NFATC4	ECM1	ZCCHC2
HLA-DPB2	COX19	PSEN1	CLEC1A	ARL13B
MYO1B	FHDC1	EPAS1	CX3CL1	UGT1A7
LOC285547	CCDC30	CCDC164	PCYT1A	NCBP2
PWWP2A	EGR2	ARIH2	ZNF836	DOCK3
HRASLS	NOL9	ARF4	C3ORF52	COL8A2
MDM4	MBD1	RAD23B	IL17C	ALG10B
WWP1	ZEB1	RASIP1	RAN	CCDC93
RORB	TXK	TMCC1	TRIM59	RNF114
TMEM67	SPEM1	GPR161	TENC1	PNN
IL13RA2	RABGAP1L	DDAH2	PLEKHG4B	CERS3
HUWE1	PTCHD3	DNAJB7	UNC5CL	MUL1
RANBP9	PIGR	TDRD6	CYP27C1	CASC5
PPP1R3A	KIAA1841	PDCD4	C15ORF54	KCNJ10
CTH	IPP	CLVS1	C15ORF56	NEIL1
BASP1	ICA1L	CCDC36	PSMD13	CXCL14
RABGGTB	GJD3	AP2A1	PSMD5	TGOLN2
ZBTB4	CYCS	MYO1B	PSMF1	UGT1A6
SHC4	CNKSR3	CASD1	PSTPIP2	ARPP21
ELOVL3	CACYBP	POM121C	EYA1	CLVS1
ZNF595	AGO3	PPARGC1A	PRKACG	PIK3AP1
KCNJ3	C18orf32	C1orf144	C3ORF72	DESI2
LOC646096	ANKRD65	SEMA3A	ETV3	RAB27B
ATF5	NPHP1	MDM4	ETV7	ZNF217
HSP90B1	C3orf36	ZHX2	RAB8B	CBL
COX17	MSANTD3	FOXP1	LEFTY2	PTPN11
SGPP1	KANSL3	ONECUT2	EPT1	C2CD2L
SLITRK2	TRIOBP	NLK	GALR2	VEZF1
TMSB4Y	TOM1	TNRC6A	CSNK2A1	CBX2
ZEB1	KLHL7	C13orf34	CSNK2B.3	TBC1D30
NKX2-4	POLQ	IKBIP	RANBP6	MUM1L1
ACSL4	ABHD15	ZMYM4	RANBP9	ANGPTL2
IKBIP	GPRIN3	PHF3	RANGAP1	TTN
ZCCHC3	ULK2	LOC100128081	OR10AD1	AMD1
ABLIM3	FKBP9	SNX7	TRAJ44	MGAT2
SNX7	SLC33A1	EIF4G3	TRAJ45	TUFT1
GOLGA7	PIK3C2A	PVRL2	RAG1	DAZAP2
SLC16A12	DSTYK	LTBP2	GRAPL	C14orf119
RC3H2	FAXC	ASCL1	RP11-114H20.1	FOXP1
NAF1	MBD6	SNX13	RP11-124D2.6	RBFOX1
SH2D2A	ZNF626	EP300	PKD2	PLP2
VPS11	MKNK2	PPP1R3A	PKDREJ	SV2B
ETF1	QRFPR	SMARCD1	CELF4	HPSE2
C11orf88	DLEU1	TRIM72	C6ORF228	PTBP2
KLF12	METTL8	PSMD11	GALNT1	IKBIP
COMMD10	LAT2	CTH	PRMT7	EREG
FAM32A	WFDC6	FTO	GRPR	KCNB1
HIST2H4A	PHF12	SHC4	GTF3C2	GTF3C2
CYP4X1	FXYD5	NR2F2	SPATA6	MYO6
TRMT12	ANKS1A	PLP2	SPATA6L	ZNF347
CALCB	BBS5	GABRG2	UGT1A4	UBE2D2
PDE7A	ASB16	FBXW11	BAX	SIN3A
TAF5L	PROSC	HLA-DPB2	MED9	DENND4A
PKP4	PPP2CB	EIF4B	MEDAG	SLC17A6
CDH7	HOOK3	UST	DHX33	SLC8A1
GGT8P	GPN2	PDE7A	GPR157	BICD2
STOX1	CEP72	MLL	CRISPLD2	AKAP12
GLT1D1	LRRC27	FUBP3	RCHY1	IL6ST
LOC643837	SCN2B	GDF11	RASL10B	ANKRD44
LOC643327	Dis3	LOC285547	PRC1	LOC102724951
C18orf32	BTN3A2	EBF3	FKBP8	RFK
SNX13	NDUFV3	EIF4E	TRMT5	PARP11
TNF	PTPRR	VEZF1	TRUB1	PKHD1L1
PCCA	MRPL37	ATAT1	TRIM72	NR3C2
SYVN1	SPIB	CTNNB1	CSRNP3	MLH1
GLE1	DIS3L	ALCAM	CST3	SLAIN2
MMP13	KRBOX4	PKP4	FAM134C	HOXC13
GLRX3	PLAA	XKR7	PDE8B	EZH2
ZFP30	RUNDC3B	OSBPL9	SERPINB9	GAB1
WDR11	RBM41	USP13	RNF31.1	MTF2
RAD51AP1	FAM213A	KCNN3	RNF34	TMEM70
SUSD5	WNT7B	SLC38A4	CLASP1	NEGR1
NEK2	SRCIN1	TTC5	COG8	MTCH2
TNRC6A	TP53	TESK2	NF2	NECAB1
ZMYM4	ATCAY	TMEM116	DUSP7	SENP6
ZNF436	PIAS2	SREK1	DUT	PDE8B
NBPF3	ZSCAN2	UBXN1	MTCH2	ZNF827
WTAP	CAMK1D	SHISA4	NKAIN2	OSTC
CACNA2D1	SMIM7	ING4	NBPF16	PAFAH1B1
CD226	TUBB4A	GDI1	RAP1GAP	PIK3R3
GLS	DNAJB13	RABGGTB	HINT3	EPHA3
SCRN3	TLR7	SMARCD2	ACSL5	WTAP
EMG1	CORO2A	PSMC1	FKBP15	ADAMTS9
FGD4	NFYA	COMMD10	NRBP2	ACSL6
MR1	TRPV2	ANKRD52	INSIG1	SVEP1
GGNBP2	ANO7	ZCCHC17	TRIM65	DCAF6
DUSP11	MYH9	HMGA2	RPL7L1	FAM134C
C15orf29	PRPF38A	SLC16A11	TRIM49B	TRDN
DUSP5P	WDR92	IL13RA2	TRIM5	SEMA3A
FAM133B	SLC25A44	RASSF8	UBASH3B	RAB3C
CT45A4	TIAL1	NAF1	ILDR1	IRGQ
CFLAR	TSPAN11	KLHL3	RMND1	VHL
DENND4A	TRIP11	STX5	IDH3B	KIAA1377
ABCC6P1	RHOH	FAM32A	IDS	SCN2A
CACNA1G	MUT	GLP1R	IER3	CACNA1D
FOXJ2	KDELR1	TACR2	ZNF549	UBFD1
C8orf41	GNB5	NFAT5	BBS5	MEGF9
SDC2	CXorf21	ULK2	CDH8	SFPQ
CT45A6	TBC1D16	NRCAM	DFFA	GLDC
RNF146	PPIE	GOLGA7	DFFB	KLHL4
C11orf24	NME6	CDKN2D	GNB3	ZMYM4
SKP1	DNAJB4	CAMSAP1	CEP95	LEPR
EMR4P	PPAP2B	MAP3K11	CEP97	ANO6
AICDA	UBE2V2	HUWE1	NMT1	GNA13
KIAA1033	HIST1H2BJ	NEK2	SPEG	SLC35D3
C8orf42	NMNAT1	TTN	SPG11	PIK3R1
FTO	AS3MT	INCENP	SPG20	TMEM55A
B3GNT6	RNF157	DYRK1A	SPG7	SMARCC2
HLA-DQA1	POLR3A	COX17	CERS5	FNBP1L
TMEM44	EMC3	DST	AFF4	NRP1
PTK7	FFAR4	CYP4X1	UQCRH	SMC3
GTF2IRD2P1	FGD6	EIF5	URB1	FBXO11
COL28A1	NOTCH3	CFLAR	C11ORF52	TTI2
CT45A3	CWC25	PTBP2	SPC24	HDAC8
DNAJB7	RABIF	IFRD1	SPDYE2	MAPK9
LOC100130301	PPM1A	TMSB4Y	NUDC	NRCAM
ARL6	CBX5	HOXA2	SNX29	AP1G1
MKNK1	XIAP	PLXNC1	C18ORF32	MAPK1IP1L
42795	WWC2	GABRA4	CTD-2368P22.1	MBD6
CT45A1	APOH	PDIA3	C1ORF162	CPD
TMOD1	SYNPO2L	PHTF2	TFEC	POF1B
FSHB	HIST1H2BG	ABLIM3	TFPT	SON
EPHA6	SGTB	SPI1	CPPED1	ENPP5
IRF2BP2	GTF2H3	POU2F1	NHLRC2	AK3
FLG2	SLC35G1	GRXCR2	SPATA2L	SPRED2
PLEKHF2	PLEKHM3	VSIG8	RCOR2	FAM102B
NPR3	LAIR1	NR1D2	SLC9A1	TDRP
POLE3	ARSE	SERPINH1	MFAP2	POM121
IMPACT	TNFAIP8L1	PHF16	RAP1GAP2	ITGAX
FEZ2	KIAA1549	SLC39A7	RIPK4	SUMO1
GPR137B	TTYH3	SUN3	CYP2A6	RORB
CDKN1B	ZCCHC24	ACADM	PPAPDC3	ARID2
EPHB2	FBXO47	CMTM6	POLI	RBM48
HINFP	CALCOCO2	DYNLT1	RNF217	PTPRN2
NR2F2	TCN2	AMY2B	NOTCH2	SIAH1
PERP	IRAK4	BSN	MGAT3	ATP6V1H
TRIT1	AMD1	C10orf28	PBRM1	FTH1
FAM135A	ANKFY1	ZFP91	FAM153C	UBE2J1
TADA1	C8orf46	ACSL4	CCHCR1	ZBTB4
SP5	ZNF514	GRIPAP1	PPP1R9A	DAB2
ARHGAP10	WDFY2	SETD7	DCUN1D2	CNOT7
TTC27	RAB13	ELOVL1	FOXN1	KDM5B
ARHGEF15	RANGAP1	HOXC9	FOXN3	ZNF23
ETS2	ZNF682	VPS11	NOL12	TRPS1
ALDH1B1	C16orf58	CEP95	CDC73	ANKDD1A
TP53	APOPT1	NFASC	HOXC13	SMAP1
GNL3L	SOD2	PRKAR1A	PTGR2	CAV2
GOLPH3L	SPPL3	INHBA	FAM109B	GINS1
ZNF25	F2R	RC3H1	TWF1	DYRK1B
C12orf77	THAP1	RNF146	SOCS7	KRCC1
CBLN2	XPR1	SLC16A12	SOD3	CDH2
GABRG2	LDHD	CADM4	SOGA1	MBLAC2
CXCR7	TMEM92	SCRN3	SOGA3.1	CEP68
PLEKHA1	SFXN1	DENND4A	SON	UPF1
THAP6	RFK	KLF12	DEPTOR	TBC1D13
SNAP23	TMEM134	AKT3	C17ORF74	NEK2
LOC100129387	PRIM1	CCDC85B	APC2	CDH4
ZW10	ASB8	ARNT	DRAM1	ZNF254
METAP1	TRPS1	TNF	MXRA7	IRAK2
EIF4A2	ZNF7	ATG16L2	MED14	CD302
AP3M2	CYB5A	BAX	EPHB4	MSANTD3-TMEFF1
HCN3	LINC00598	ZFP30	FAM71C	RBMXL2
RUNX1T1	ZNF708	ITGA3	PMP2	ESRRG
TEK	C8orf37	PCCA	PRCD	TRIM9
ZNF331	ZNF665	ELK1	MAP3K5	KMT2A
NLRP7	KIAA1875	RGNEF	CAPN14	TADA1
DOCK8	LYRM7	WDR11	CAPNS1	LOC102723367
SLC38A4	PTPN4	B3GNT1	PITPNM3	FAM73A
BCDIN3D	FLT3	C18orf32	CBX1	GLYCTK
PTPRE	CTNS	COL4A4	CBX2	ACBD5
TMEM116	ZYG11A	TRPM4	ATP11C	BMPR1B
PLB1	WDR77	FKBP8	FGFBP3	XKR8
FAM149A	UBN2	HIST2H4A	TNFAIP8L1	STX5
ZC3HAV1	TRAPPC10	SH2D2A	TRERF1	MANBAL
MURC	TNS4	SPATA1	PPP2R5A	SNX7
ABCB9	TNIP3	NPR1	ZNF729	CALU
DDAH2	TNFSF15	MMP13	ZNF75D	UBE2G2
CCDC66	TMOD3	MMP14	ZNF764	SLC35E1
LACTB	TBL3	PPP2R1A	ZNF765	CROT
UBFD1	SYNPO2	GLRA1	DEFB1	PRRT2
WDR60	SOCS5	AARS	DEFB124	MAP2K4
GLP1R	SLC6A4	TMEM67	CCDC88C	IMPACT
CCT6P1	SLC1A5	ACVR1B	KATNAL2	MYADM
CD38	SERINC1	IFIT5	RBMS1	TNF
C3orf18	SCO1	CDH7	RBMS2	AMELY
MGAT2	RPL24	CALCB	RBMX2	PARD3B
TNFSF15	RBL1	RAD51AP1	RBMXL1	PALM2-AKAP2
CANX	PNRC1	C8orf41	LSG1	CDCP1
PDF	PLXDC1	CCR2	DOCK4	TFEC
RAB32	PCP4L1	C15orf29	ADORA2A	SAYSD1
KIAA1704	OCIAD1	GLRX3	C9ORF24	UBAP2
PUS7L	MRPS25	SLC2A14	C9ORF38	TMEFF1
PLP2	MANEAL	SOCS1	C9ORF41	PCDH20
EBF2	KIAA0930	EGR1	C9ORF47	SNX30
LOC653653	KCNK3	C3orf18	RPRD1B	RTP1
PLEKHA5	C21orf33	DNAJC9	FOPNL	PATZ1
ARFGEF1	FAM153B	SUV420H1	DPP8	FAM101B
IFRD1	EREG	TET3	MYO3B	SIX1
KRCC1	EMC7	GCM2	STARD5	ZNF189
CNOT2	EFCAB11	LOC643327	ZNF585B	SLC30A5
MICAL2	DHTKD1	TSC22D3	LAMC2	SRSF2
TMEM55A	CNNM2	ASXL3	GSK3B	NEFL
KLF6	CEP135	SYVN1	C8ORF37	POM121C
C5orf23	CDK2	PTK7	PHF21B	ATP5G3
TSEN15	BCL11B	SP1	MBTD1	TDRD6
ZNF711	ARHGAP29	SKP1	FAM155B	ADIPOR2
VWA5A	MON1B	MGAT2	ARFIP2	ZNF25
NCKAP5	IGF1R	CACNA2D1	UBXN2B	ENOX1
ZFAND3	SENP8	UBE2Z	UBXN4	NCOR1
SLC2A13	PCYT1A	VTI1A	GRAMD4	FAM150A
FADS1	TTC4	CBL	GRAP	TGFBR1
C6orf182	EMP1	PIGO	SPATA19	FAM84B
MASP1	DPYSL5	ZNF436	SPATA25	ANKRD6
EPS15	TEP1	ZNRF1	ABCG4	ZNF33A
PDK4	RPL14	TMEM48	IGSF10	MTMR4
DYRK1A	MTMR9	GTPBP3	CTNNA2	CARD8
THAP8	COL9A2	IPO13	BLVRB	DUOX2
HAS2AS	AKIRIN1	ZW10	AGPS	PPM1A
TUBE1	ABHD2	NEMF	AGTR2	MLEC
FAM153B	NUDT3	CDAN1	AHCTF1	LGALS8
COG8	CYTIP	PFN2	AHCYL1	SORD
EPGN	LRIF1	ERP44	PRSS27	YRDC
EREG	STAC2	R3HDML	ZFYVE20	UBP1
AMN1	MIPOL1	FOPNL	ZFYVE27	CEBPG
SMC2	XPNPEP3	FOXJ2	MYO1F	GOSR1
SLC8A1	DEGS1	EDA	SLC2A6	ELAVL4
CPSF7	GNL3L	MGAM	NEURL	ZNF625
TGDS	TMEM127	NEGR1	EGLN1	AIFM2
PHF16	ALDOA	MYST3	SESN3	ETF1
VPS4B	SLC35F6	KCNIP1	MRPS18C	DENND4C
MBD6	POFUT1	TRMT12	APITD1-CORT	PAK7
PTPRH	GK5	C11orf88	APOA5	THBS2
CHMP4C	CSNK1E	SLC6A12	C4ORF3	ZNF805
FRAS1	LTBP2	CACNA1D	RAB2B	ARAF
NUBPL	LCTL	PWWP2A	MSANTD3-TMEFF1	SP5
PPIC	NUGGC	WBSCR22	MSANTD4	KCND2
TMEM108	CXorf38	GPD1	UNC13A	ABCB9
SLC22A2	ENTPD4	GLG1	PWWP2A	MIB1
ALPK1	SEC14L4	CPSF7	RASA3	PKP4
MAGOHB	MICA	PBXIP1	B4GALNT3	C8orf59
CRTC3	C15orf40	AICDA	RAB5B	STXBP4
SPIN3	HYPK	ARHGEF15	SLC23A2	42800
NBEA	GTF2H2C	MMP16	CHCHD3	FKBP14
CCR2	TMEM33	RC3H2	GIT2	GRIPAP1
PTBP2	PTGIS	GLS	CREB1	AOC3
MGC57346	GTF2H2	AKT1S1	FMOD	SMCHD1
ZNF397	SRXN1	WDR67	FMR1	CAMSAP1
IGFBP4	CCS	POF1B	HOXA2	SRSF1
GON4L	PPP2R3A	GPR182	WDR36	ENPP2
MUC19	PDE6A	SCP2	WDR37	TRMT10C
ANKRD57	LEAP2	EMG1	NOLC1	MEX3A
POF1B	ZNF551	TNRC6B	ZNF556	TBC1D14
GJB7	PDZD8	RAB6A	C11ORF68	PLXDC1
CNPY3	STX4	ADARB1	ZC3HAV1	RIMS2
DGKH	ZBTB25	RPRM	TMEM106C	SCD5
SLC1A6	SLC35F5	LMTK2	PYGM	PIGK
ANXA4	MASTL	FAM57B	PYGO1	IL8
KCNIP1	NPHS1	MRPL27	KIAA1522	GGNBP2
TRPM8	MIXL1	FEZ2	KIAA1549	VAMP2
E2F5	HILPDA	FSHB	TRIM9	XXYLT1
CACNA1D	MUC4	CT45A4	POLL	GAN
VWA3B	RUNDC1	TEK	WNT7A	OSBPL9
CSPP1	SPAG16	KIAA1033	CRBN	SGMS1
TM4SF20	METTL21A	TRMT1L	CRCP	TMEM87A
C2orf24	SAR1A	KCTD9	IL28RA	ARID1B
CMTM6	CD96	MBD1	N4BP1	IL1A
MBD1	TLDC1	IGSF1	AIF1L	PTGFRN
IPO8	SLFN13	ABCC6P1	CELF6	GADL1
LOC389765	PGBD4	LMO4	COL24A1	PTHLH
AP1S2	YRDC	IMPACT	E2F7	INCENP
HEATR5A	NIPAL1	MKI67IP	EIF2C4	DCTN4
ZNF625	C19orf40	NLRP7	NETO2	UBE2D1
POM121L8P	ETV3	DOCK8	RHOBTB1	FAM63B
RGS2	PDHB	C8orf42	DYNC1LI2	ACSL4
TRIM52	MIS18A	VWCE	CHD8	CREBRF
C3orf58	PAK3	PRRC2A	TAS1R1	CALCR
KCTD16	NEK8	PIK3AP1	AC007952.6	PDCD4
NFATC3	RABAC1	FBXO38	ATRN	IFIT5
AKT3	TMEM174	GAK	EIF4E	NUBPL
EIF2AK3	CEP104	SNAP23	GALT.1	PPP2R4
AKR1D1	INTU	SOX11	GANAB	PLXNC1
ARIH2	GPR182	ZNF625	GAPDH	LRAT
LOC284661	LY6G5B	PAFAH1B1	LRP1B	CNTLN
C10orf47	DCTN5	GRIN2D	LRP2BP	OTUD7B
FUK	FAHD1	ARSI	LRP6	KLHDC7A
EBF3	MTRNR2L5	CXorf23	SDC2	TMEM64
MYPN	C12orf49	PERP	SPAG8	CLDN8
SS18L2	C11orf1	GGT6	MRPS16	ADAM19
CYSLTR2	BHMT2	APPL2	MRPS17	RNF219
KCTD3	C12orf65	42795	SHROOM4	TXNDC12
BLZF1	ZNF573	UBR1	GATAD2A	SCYL3
TNFRSF10C	S1PR3	EMR4P	HMGN4	PNPO
COG1	PURB	CT45A6	GATA6	BBX
MCOLN1	TRAF3IP2	SUSD5	RASSF2	FBXW11
FAM134C	HSPA4L	C11orf24	C16ORF88	GLE1
RPL13AP3	XPOT	KDM5B	HINFP	TSPYL5
RASIP1	WDR53	TMOD1	ZYG11A	HK1
TTC26	WDR12	KRCC1	UBE2B	PPARGC1A
PIWIL1	USP15	ZNF25	SYPL1	PDS5B
LARP7	LMTK2	EPHA6	SNX30	SP1
FAM71F1	TRUB2	UBL7	SNX33	PDE7A
TNFRSF17	TM4SF5	DAB2	SNX5	INSR
LOC728485	SNX2	PCDHAC1	FCF1	ZBTB6
PPP2CB	SIGLEC9	RAB32	FOXI2	FAM19A1
FAM185A	SHE	PLEKHF2	FAM190B	TM9SF3
TDRD6	RNF34	POLE3	ADCK1	FAM32A
CELF1	RAPGEF6	HLA-DQA1	TMEM50B	QSOX1
SUN3	PGM2L1	RBFOX1	ZNF366	TRUB1
PRKDC	ORAI2	HINFP	ABHD2	SUN1
BTBD18	LRRC15	MAP1B	C10ORF10	CMTM4
C1orf115	JDP2	ZMAT2	DVL3	FADS1
DLX6	ITGB3BP	ZNF444	CDKN2B	POGK
ARMCX4	HS3ST1	IPO5	KIAA1161	TMPRSS11A
CLEC2D	GPR137B	TTC27	DES	SLC16A12
ZNF33A	FAM89A	RICTOR	NDUFA13	MIER3
CATSPERG	DDI2	PAPD5	IER5	SORCS3
CAP1	CRISPLD2	ABCB9	BTN3A3	FYN
ALMS1	CPT1A	SORCS3	TBC1D2B	TMOD1
PSMD11	CAPZA2	PPP2CB	AKR7L	SPOPL
ITGAX	AGMAT	THAP6	TRAPPC2	PLEKHA1
WSB1	ZMAT3	MRPL9	TRAPPC2L	CTH
LOC100129794	ZNF878	SRCIN1	TRAPPC6B	ZEB1
ADAM23	HAS2	GTF2IRD2P1	TRAV1-1	NLRP7
MYL6B	HMGB1	COL28A1	GLRA1	ACER2
C6orf64	MCTS1	SGPP1	AP001816.1	TROVE2
UBXN1	PTRF	DPF2	LRRFIP1	GK5
ERO1L	ISG20L2	CT45A3	ZNF791	UBE2G1
PROX1	ZNF699	RNF165	GDI1	ZNF490
MGC31957	PAIP2B	LOC100130301	TRIM25	PHF3
SAE1	KLHL21	ZNF148	TRIM32	AFF4
LOC441259	FRAT2	ARL6	TRIM33	PARP16
SUCLG2	SUGT1	BLZF1	TRIM35	THEMIS
SENP6	ACOT9	TMEM44	NLGN4Y	LOC102723360
MYOCD	NR2F2	C7orf64	CLEC2A	ATF5
EFCAB4B	RNF165	ARAP3	ZNF107	PLEKHM3
MUC4	MACC1	TCAP	CRP	PDIA6
PHYHD1	MFSD2A	FLG2	SLC25A37	XRN1
C10orf28	APEX2	PTPRE	SH3PXD2B	HN1L
MCTP2	PDCD4	LASS5	ST6GALNAC5	KIAA1468
GDF5	GGA2	MKNK1	CA8	SLC7A11
DMGDH	TCEB2	CT45A1	AP003733.1	ATXN7
RNF219	RNF115	ARAF	HAUS5	NAMPT
GNAI1	LIPG	CDKN1B	HAUS6	CLOCK
ZC3H8	RRP36	TRIT1	HBCBP.1	MYB
BTLA	PSMC1	VSIG10	HBM	SLC30A6
OSBPL9	KIAA1551	AMOTL1	HBS1L	RIF1
EPB41	C14orf119	THAP8	HCAR1	EPB41L5
MUM1L1	SYNJ2BP	ZNF331	MIER3	PRKG1
SULT1E1	ANKS4B	C6orf154	MINK1	ZADH2
DACH2	MAPK13	FGD4	CDR2L	RNF165
DIRAS3	ABCG8	SRPX2	CDRT1.1	ZNF197
SP100	ELK1	LARP7	GPX5	ALPK1
DNAH14	GNE	TRIM66	ITGAX	TMEM108
RASGRF2	FAM185A	NCLN	IGF1R	PAPPA
NDUFB4	VPS53	CPD	IGF2BP1	SFXN2
GAA	C14orf105	ARHGAP10	IGF2BP2	CCDC88A
RPAP2	ZNF460	NEFM	RP11-188C12.3	LDLR
DDX3Y	TMEM50A	ETS2	MAGT1	RBPMS2
TMED7	SRCAP	ZCCHC3	SSR3	GM2A
DLEC1	SMUG1	BRD1	CAMK1	THUMPD3
PRH2	SLC7A11	CXCR7	CAMK1D	YES1
CSNK2A2	SKIDA1	ZNF229	PWP1	KREMEN1
SCP2	SERF2	MR1	DAK	CDV3
POU2AF1	RTN2	FAM135A	C17ORF72	LOC102724843
KATNAL2	RRP1B	GTF3C2	NHS	HILPDA
KCTD9	PWWP2A	ALDH1B1	ANGEL1	PROX1
RNASEH1	PNPLA3	DLX6	GGNBP2	PRKAR1A
DDHD2	PIGM	SLC22A2	ARL15	CCDC59
AMAC1	PARD3	PIGG	NKD1	STRN3
LOC203274	P2RX7	GOLPH3L	TSKU	PLAGL1
IFT46	MRPS27	FADS1	TSNAX	OLIG2
SLC17A7	MFSD11	TNFRSF17	TSPAN11	RACGAP1
INHBA	KIAA1715	POLD3	FAHD1	HOXA2
EGR2	HAUS2	STK39	POU2F1	TMEM194A
CCT6P3	GRM6	RPUSD2	RAB11A	NCAM2
C2orf72	EXO5	ZC3HAV1	EPN2	DENND2C
REEP5	DSN1	ASB3	KIAA0513	ENSA
TOMM70A	DNASE2	NEDD8	PCDHA8	PLAUR
POLD3	DNAL1	STRADA	DCTN5	TSGA10
SMARCE1	LGSN	NBPF3	BACE1	ZCCHC3
WDR37	CDKN2AIPNL	CBLN2	BACH2	SEC24D
FCGRT	ATP1B3	PPFIA3	BAG1	C12orf74
GTF2IRD2B	F2RL1	GAB1	GGT2	PRICKLE2
TOP1P2	EP300	C12orf77	FAM32A	IST1
CD274	SYAP1	NTRK2	NOVA1	TMCC1
LASS5	MTSS1L	METAP1	HERPUD2	LOC102724441
RUNDC2C	RBM3	PHACTR1	HES2	SAMD7
UBE2J1	CDIPT	CLDND1	HEY2	PCDH17
SFRS3	MAN2B2	C14orf43	HFE	ZFP30
IFI16	CDS2	CLCN6	ELK4	IKZF2
CRP	FAM13B	SLC8A1	MGAT5	ACBD3
FBXO44	RNF19B	ZNF711	HCCS	ACER3
PDPK1	ZHX3	MASP1	GDNF	SCN3A
TTC21A	TTLL12	HSD17B1	IL10	LIMD1
CIDEA	NKD1	AMN1	GDF5OS	PPP1R10
ACP1	RAI1	SEC31B	NCKAP1L	SPI1
FAM126A	AMOTL2	GPR137B	NCKAP5	COL9A1
MEGF9	KCNK5	MAPK13	NCKAP5L	ZMYM2
GPR109A	PLEKHA2	SULT2B1	NCLN	NCALD
DIO1	ZNF578	MUC4	NCMAP	SLC30A7
ACTR10	EZH2	USH1C	ODC1	MUC4
ZNF335	TTPAL	MYPN	OLIG1	RFX3
ST6GAL1	PLA2G16	GJD4	AC023632.1	PURA
FAM102A	TEAD1	PDE2A	SELPLG	PTBP3
ZC3H14	GOSR1	KCTD3	SELT.1	STAP1
DMTF1	CRCP	TGDS	SELV.1	CADM2
TMEM87A	DNAAF3	PRRT2	RERE	CDK14
OLIG2	ZNF347	C10orf46	FAM169A	MRPL27
TDG	GDF5OS	RNF32	SOWAHC	DEPDC5
LOC554249	LRRD1	ATP2B1	CNTRL	PPP1R12A
GAGE7	RAB21	UBE2M	CTD-2228K2.5	ATXN1L
C10orf27	ATP9A	DUSP5P	RUVBL2	GPR26
TRIM9	ACOX1	EREG	RWDD1	C3orf58
PIK3AP1	PDIA6	CCNJ	RXFP3	ITPR1
RMST	DRAXIN	FAM134C	RXRA	KCTD17
OSBP2	CAMK4	ITPRIPL2	ZNF527	TRIM44
CNIH2	PTCHD1	TMEM108	FAM173A	FOXO4
ZDHHC2	REL	ZFAND3	42798	PTGES3
ZNF418	CARHSP1	ZNF189	RAD23B	ZNF460
XYLT2	BDP1	NBEA	DNAJC5G	SCIN
FOXP1	TIMM10	SETD5	DNAJC8	TMX1
C18orf19	ZNF582	NFATC3	MYOM3	SREK1
CEP97	ZBED1	LACTB	TMEM223	IL7
SLCO3A1	ZNF454	RNASEH2C	NFAM1	KIAA0895L
RNASEL	LRRC1	NPR3	GP6	UGT1A4
RANBP17	TMOD2	TMEM179B	USE1	FAM46C
GTF2IRD2	NKX2-1	ARPM1	USH1G	MSANTD2
CAPZB	HIF1AN	ADCY10	SLC25A17	COPB1
MPZL1	ATAD2B	RIMBP2	SLC25A24	OPN5
C7orf64		PKMYT1	THEMIS	NAP1L1
PPFIA3		SMPD4	42795	LOC102724219
LRRN2		PDK4	ARL2	EME1
TP53RK		PPOX	GFOD1	THAP2
GALP		HCN3	VIPAS39	POLH
PDP1		AKAP9	ZNF831	TNPO1
SYNPO2L		LRRN2	SYN1	ZNF555
ITIH5L		SV2B	RP13-279N23.2	KRT20
INCENP		PISD	RGR	C7orf71
RPL28		IPO8	EIF5A2	MDM4
GRIPAP1		EPS15	POP4	C11orf95
WDR33		AP3M2	CCDC90B	PIRT
DOCK9		TMEM55A	CCDC93	FMNL3
FBXO39		ZNF326	GRB2	TRMT12
ACAD8		ZNF474	C7ORF55	NR1D2
LOC728342		FOXO4	SPTBN5	SLC25A24
ITGB3		C6orf120	FZD4	KIAA1143
IRAK2		PTGFR	FZD7	ELOVL1
GINS1		CNST	ARHGAP20	SCN1A
LOC100128262		PLEKHA1	IL1A	FAM168B
SYS1		CPEB4	CLTC	ARL2BP
LOC389043		ANKRD57	VPS37C	COX4I1
EIF4B		CHTOP	RP11-676J12.7	ADAM22
C20orf7		C3orf58	KLHL8	FAM126B
CHCHD1		TSEN15	KLHL9	FAM126A
RXFP1		ICAM4	KLK1	KCTD3
ARAF		COPS3	ARSD	ZFHX3
CDAN1		WIPI1	WDR5	ZDHHC22
CFL1		TUBB	CNIH4	MEOX2
IL1A		CCDC22	TMEM41B	CXorf22
NMI		LOC646096	TMEM44	NANOS1
RIMS2		KCNJ3	ZDHHC15	UGT1A1
LOC728323		TMTC3	EPG5	PRKAA2
DYDC2		PPM1H	EPHA2	ZNF780A
ZNF229		LIPH	GCNT2	SNAP23
ATXN10		LOC643837	COL5A3	NEBL
PNPO		ADH6	COL6A3	FTO
VAC14		KCND1	GAA	RRM2
NEGR1		CAPZB	MANSC1	AHI1
XRCC2		PLB1	MAP1B	ITPRIPL2
APH1A		CYSLTR2	MAP1LC3B	SLC30A4
PSTPIP2		CHD2	GCFC2	TMEM44
CYP2B7P1		FAM149A	ICAM3	CDKN1B
ZNRF1		EIF4A2	BTBD18	BAHD1
ZNF182		NUBPL	RPL37	PVRL2
MYCBPAP		SLC2A13	UGT1A5	RANBP9
TBX18		ATF5	UGT1A6	LTBP2
RAB3C		MYADM	RAD51L3-RFFL	ALS2CR12
PTMS		FAM3B	AC093726.6	BTLA
CLEC2A		CCT6P1	TMEM215	TMEM179B
MRPL36		EPB41	PRPF40A	DHX36
PRKAR1A		SLC35A2	PRPF4B	POU2AF1
NEK11		CXCL14	METTL2A	LRRTM4
BHLHE22		GON4L	C8ORF58	LRRC1
NBR1		CD38	IAH1	ACTR1A
COBL		SMC2	BEX4	MPP3
TPM3		MRPS27	ZNF485	SRGN
ZNF460		IFFO1	ZNF486	RNF19A
ZCWPW1		ALMS1	DAB2	KIF1C
WDR1		SLC2A3	DAB2IP	LRIG3
SNIP1		LGR6	KIAA0284	COL19A1
GMCL1L		CANX	TSPAN18	LY6G5B
SLC20A2		STYXL1	ZNF490	GPATCH8
SHFM1		ATG9B	PHOX2B	LPPR4
PWP1		ARF5	TMEM236.1	SLC41A1
CYP4A11		IFT46	XKR8	CYFIP2
SH3BGRL		NCKAP5	ATG7	HSP90B1
EIF5		UBE2E3	SLAMF7	WDR11
ZNF525		LOC100129387	STK35	MCC
RFNG		CHMP4C	INPPL1	WDR44
SCIN		AKR1D1	DYNC1LI1	HECW2
LOC100132891		CNOT2	SLC35E1	LONRF1
SLC39A7		HEATR3	SLC35E2B	KCNIP1
DUSP10		PDF	GNA11	WASL
KIF1C		VAMP2	SLC14A1	GABRG2
ARL13B		TRIM9	RCSD1	EIF4B
GAP43		PAPPA	RD3	VPS26A
PBOV1		STOML2	RDH10	KLHL21
MBOAT1		SYNGAP1	RDH16	WDR17
ZNF138		SAE1	NMNAT2	MMGT1
TRPS1		KIAA1704	DENND6A	TMX3
B3GALT2		LRRC4	SBSN	ATG5
B3GNT1		POGK	SRGAP3	CYP4X1
PCBP2		NEIL1	SRGN	TGDS
CCDC25		FAM71F1	GBP1	UST
CLDN14		LOC653653	LARP4B	THEM4
IL23R		PROX1	ITPR2	METAP1
LOC647288		TNFSF15	ITPRIPL2	VAV2
PPP1R12B		ARFGEF1	ITSN1	SERBP1
C1orf198		ATP8A2	IVD	CYB5R4
HTRA1		PUS7L	DCTN2	RNF146
MRAP2		MAP3K12	STAT4	EHF
KCNB1		RIIAD1	QPRT	SGTB
RAG1		FKTN	POC1B-GALNT4	SUCLA2
KDM5B		AP1G1	PODXL	NOTCH3
PAFAH1B1		KIAA1274	FAM106B	AKR1D1
TMEM64		SLC22A9	CYP26B1	CMTM6
ZNF85		CAMK2G	SLC35D3	NAV2
RANBP6		MTA3	PCYT2	PRKRA
SYCP1		JPH2	PDAP1	TMBIM4
MAPK13		INPP5A	PDCD1	ETS2
ACVR1B		GAA	FREM1	TBX15
SMUG1		EIF2AK3	TIFAB	NYAP2
LRRC38		GLDC	AC016586.1	MAMDC2
NCRNA00159		FAM35B2	PLXNA3	GPR107
GNG11		PRKDC	STXBP1	TRIM59
SULT1C4		POM121	CYP2C18	PPTC7
CALCR		SLC12A5	RP11-644F5.10	SZRD1
C14orf70		DGKH	RPL8	TRIM66
TIPRL		KATNAL2	TTLL12	AICDA
CYB5B		ZNF33A	SRGAP1	CAPRIN1
RECQL5		LASS3	ERAP2	COL4A3BP
C6orf176		PHC1	SLC9A2	GPHN
C13orf38		SDC2	ZBTB7A	KLHL3
PSMC1		MAGOHB	MLL	ARHGAP24
CEP68		SCIN	IFITM3	LOC389831
C1orf200		KLF6	IFNAR1	SLITRK2
ZNF326		PA2G4	IFRD1	FBXL5
PIGK		CEP57L1	HRH1	DCP2
UHRF2		GIGYF2	FAM120AOS	SAP130
MAP7D2		KPNA7	FAM120C	HECTD2
C3orf63		HAS2-AS1	SPIN4	TAF5L
PRKACB		TM4SF20	TSPAN33	HNRNPAB
BST1		PPP4R1	TSPAN5	TPPP3
PARP16		TUBE1	TSPAN7	CLIC5
NOLC1		COG8	NSD1	XPNPEP3
CCNJ		RASGEF1A	HRH3	LACTB
KIAA0174		VWA5A	TPPP3	REST
CDC27		RAB3C	GRIK3	DOCK9
BANF1		TM9SF3	SLC7A11	RHOBTB1
ASCC1		ST6GAL1	WDFY1	AK4
ZNF136		WWP1	CSNK1D	CACNA2D1
FCRL5		EPGN	SPDYE6	ALOX15B
LPO		PLEKHA5	ACADSB	TXNDC16
GCM2		NFE2L2	GZMM	DYRK1A
RPL7L1		RNASEH1	H2AFJ	SOCS5
UTP15		HDAC8	INCENP	B3GALT2
MTCH1		DHX36	ZNF417	MOB1B
HMGA2		RNF135	ZNF425	RDH10
BBS9		IRF8	ZNF426	UMODL1
INHBE		NCAPG	ZNF430	PSMB6
TMEM174		FRAS1	ZNF431	NETO2
C10orf55		OSBP2	AC093802.1	DFFA
SUV420H1		PPIC	SVOP	RC3H1
SLC20A1		AKIRIN1	EHD4	AMOTL2
EPC2		BTLA	ADAM19	NUTF2
MLL		PRKACG	S100A3	BASP1
MTMR6		ISLR	S100A4
LOC503519		PTPN20B	S100A5
CD84		ANKRD58	SCO2
C6orf15		CYP8B1	C19ORF40
ARIH1		MIB1	C19ORF47
PTGFR		GJB7	SHARPIN
USH1C		MGC57346	ZNF813
UMPS		PKHD1	EAF1
CXCL14		DUSP16	NAF1
AKAP6		MUC19	STIM1
C8orf12		UBE2J1	SERPINA11
C1orf230		C10orf47	ARHGAP22
FANCD2		CALU	ARHGAP24
TOMM40		ZNF397	PPP1R3G
ZNF582		DSTYK	NDN
FAM73A		PDIA6	HK2
SYP		HARS2	DSCR3
CAMLG		PLAG1	ABAT
RAB23		CNPY3	ABCA2
SNAPC3		IFI16	ABCA8
API5		CBY1	ZCCHC2
SAR1A		SPIN3	ATP8B1
HERC2P2		FAM185A	SUCLG2
VSIG10		TRPM8	SPATS2
RRM2		GDF5	IL13RA1
ABCA17P		GALP	XYLT1
C15orf48		TDG	RP11-680F20.4
CROT		REEP5	RP11-680F20.9
ZNF577		TRPV3	PCDHA5
WIPI1		ILK	PCDHA6
FER		FGFR1	PCDHA7
AIFM2		WBP1	RHOBTB2
APC		KIAA1310	ARL4C
LOC387647		FAM105A	UNKL
NUP133		INHBE	UPF1
FAM198B		AP1S2	TRMT12
TP53AIP1		LOC389765	TRMT1L
PLXNC1		LOC100147773	C11ORF75
CD164		HEATR5A	C11ORF87
VPS13A		RGS2	C11ORF88
GLUD1		DHX8	C11ORF9
KIRREL2		PRMT8	C11ORF92
RGS12		TCF12	C12ORF36
GRID2		GOSR1	CADM4
NANOGP1		SYNPO2L	ZNRF4
XG		TRIM52	ATXN7
TUFT1		CCDC88B	RP11-219G17.4
DHX30		SRSF3	NCR3LG1
UNC80		LRP11	DESI1
CGNL1		GNG11	DESI2
WAC		NSUN4	TRIM46
CCDC68		RASGRF2	DYRK2
GINS3		CRP	DDN
CCIN		PRRC2B	SRI
ZNF160		OLIG2	SRL
HEY2		RBMX2	OGDHL
GCOM1		MRPL12	LCP2
NCAM1		KIAA1324L	SLC25A34
CNTLN		42800	METTL7B
UTP6		COL4A3BP	ISG20L2
LIMS1		SHROOM4	CHP2
TRAPPC2		C6orf174	RGPD5
PHF6		BTBD18	SLC30A5
LEKR1		MRPL36	PML
ADAP2		FAM49A	REEP4
TUBB		CEP68	REEP5
LOC255130		ATP8B2	CCP110
PPAPDC2		EFCAB4B	SMPD2
LOC646999		DIRAS3	SMPD4
LOC285043		ANGEL1	SMTNL2
TTLL5		ADAM15	CAPRIN1
DHX36		CD164	MSANTD2
RBMY1F		ALPK1	ARHGAP42
SEC31B		FUK	EMCN
PCSK1		SS18L2	LEMD2
RAB8B		HEY2	LIPA
C16orf57		TTC26	IL6ST
ZNF667		XYLT2	L3MBTL1
ZNF700		CHD3	C4ORF40
SLC25A44		PTP4A1	C4ORF46
ERC1		IL13RA1	OR51I1
HARS2		PSTPIP2	OR52B4
NEIL1		UNC119	LOH12CR1
ZNF384		CNKSR2	LOH12CR2
XBP1		DENND5B	LONP2
ZNF66		LIN37	GTSE1
FLJ35220		TNFRSF10C	GUCD1
PTCHD1		PIWIL1	FAM161A
SLC41A1		COG1	MTHFD2L
TSC22D3		OTUD7B	MTHFR
EP300		PTGIR	SLC9A7
THUMPD3		GRHL2	SOX6
SYPL1		VSTM2L	UBL7
ABHD12B		RPL13AP3	OTUB2
TBC1D14		WDR37	TXNDC12
POM121C		NOLC1	TXNDC15
FNBP1		CIDEA	DPP9
RING1		SUCLG2	MRI1
SMARCD1		DCX	MRP63
PLAG1		C15orf48	TRPA1
ACBD3		KCNB1	PTDSS1
CD48		C12orf68	PTEN
C7orf68		GADD45B	SDHC
MRPL27		ACO1	TAB3
SIRT5		SLFN11	TACC1
CCDC42B		MAP3K14	TACC2
SFRS1		VWA3B	TACO1
MBNL3		CC2D1A	SRRM2
PPFIA1		NUPL1	COL17A1
IMPG1		SUMO1	RP11-111H3.1
LRFN2		VPS4B	NOXO1
MYCT1		CYTH1	C18ORF62
LAMC2		RPAP2	RPL37A
SOBP		FCGRT	BRD1
ZNF37A		GINS1	IFFO2
RUNDC3B		IMPG1	ITGA6
FOXRED1		SLC7A4	THAP8
PTK2B		CD52	THBD
ST6GALNAC6		C6orf64	THBS1
HCP5		DNAH14	PPFIA1
ACER3		CD226	CCDC88B
RNF17		IL1A	OR6C6
GPC4		RIMS2	GAL3ST2
RPS15A		FIGN	PPP1R3A
DLX3		TMEM101	TRAF3
SLC25A20		RNF219	KIAA1191
NANOG		FZD4	KPNA6
ZNF192		FAM126A	TNFRSF19
SLC25A13		FBXO44	GLT25D2
C8orf44		CCIN	MTO1
ATP1B4		NUP98	TRIP11
CYP8B1		HTR3B	CCNYL1
SNTG2		WDR19	NUDT18
STX5		MURC	MEF2D
SLC45A3		ZNF460	CBX7
PHC2		RECQL5	CBX8
CHD1L		PRH2	NEMF
GABBR1		TLE4	WNT7B
DYNC2LI1		PIM1	MBD1
GNAT1		STIM1	MBD6
NMT2		GLT1D1	ADAMTS9
LTBR		CAMK1	ADAR
CC2D2A		FAM110B	PNPLA1
SMC4		ACAD10	TMEM108
SORCS3		FAM133B	TRIM56
PHTF2		CAP1	JMJD7-PLA2G4B
LDLR		MPZL1	AC187652.1
C6orf120		ACBD3	ACACA
DCDC2		FAM35B	MRAP2
ANKRD6		PDP1	BAG5
EXOC8		AFF4	BAHD1
CCDC109A		KIAA0100	GTF2A1
USP13		SIRT5	GTF2F1
PAQR9		LOC100129794	PLIN5
REST		CHCHD1	MYSM1
REEP4		CD84	RAPGEF5
HCG26		ADAM23	TLR10
SLA		CATSPERG	PSEN1
LTBP2		BZRAP1	RRM2B
WDR5B		SUV39H2	PRAMEF5
PDXDC1		CORO7	PRAMEF6
UBE3B		CAPN6	GGTLC3
C19orf42		STMN4	RMND5B
UBE2Q1		ZNF138	RP11-247C2.2
COPS6		SMG7	WNT9A
NOTCH2		TGFBR1	DIS3
CELF3		RAPGEF3	NDNF
CCT2		TBC1D22B	NDNL2
SLC4A10		CDC73	UNC5B
GPR85		E2F3	UNC5C
XKR8		LOC254896	ASB5
SLAIN2		IL18	NFATC2
MAP1LC3B		ATHL1	C12ORF65
LOC255512		ZCWPW1	KRIT1
TMEM194A		GTF2IRD2B	KRR1
POU4F1		RFNG	PCDH20
WDR27		FAM117B	SYNGAP1
RNF207		CCL5	SYNGR1
KIAA1310		PAN2	EIF3B
C7orf31		TIAM1	RP11-262H14.4
UGT3A1		GRAP	TM4SF20
LOC341056		RBPMS2	TM9SF3
DUOXA2		WDR60	BAZ2A
SLC6A6		PHYHD1	RP11-366L20.2
CYTSB		NT5C2	MRPS21
DRG2		DUSP11	OTUD6A
TRIM68		ITIH5L	ATAD2B
HNRNPH3		BCDIN3D	ATAD3A
HOXC9		UMPS	EPHB2
IRF8		PDS5B	PMEL
GDI1		CDC27	OR10X1
VAT1		MBOAT1	SOX10
GAN		LETMD1	DENND1A
ATF7IP2		PHLDA1	MAPK13
MRPL10		EPG5	ULK2
NR2E3		RAD54L	ARF1
DLGAP1		PNPO	FOXRED1
FAM3B		ZNF582	VN1R4
PABPN1		CHRNB2	ZNF347
TMEM48		DMGDH	IARS
RPUSD3		DEM1	TBCD
RPL11		ZNF700	FBXL7
EXOC4		GPR50	ADH6
SLC4A9		GLYCTK	SRRT
LRRC43		C6orf103	SRSF12
GGT7		EFNB1	OPRD1
ITGAM		NPTN	OPRL1
SRI		ZC3H14	PATE2
TMBIM4		CAMLG	PATZ1
PLA2G12B		PTCH1	TRIM24
AAGAB		MUM1L1	UBE2A
UST		ZNF85	CTRC
THOC4		CAMK1D	GPR55
ZNF527		ERO1L	GPR68
NOTCH4		GNAI1	SHQ1
RBPMS2		GDF6	ARIH1
ULK2		CELF1	DZANK1
SUMF2		DLEC1	E2F1
C2orf67		SYP	ERO1L
LOC339260		ZNF182	ERP44
SP1		MDN1	ERV3-1
SAP30L		CC2D1B	MRPL41
USP54		SH3TC2	SCML2
SCML4		ZC3H8	ALAD
TMX3		CCDC25	TNS3
ATP6AP2		EPN1	TOLLIP
KCNT2		DTX4	AL590822.1
PIRT		CHST5	AL590822.2
PDS5B		NAV2	VPS72
NCEH1		HNRNPU	FGD6
ELF3		DRD2	PADI1
STK39		DUSP10	FBN3
MAN2A2		GRB7	MIB1
PKMYT1		C4orf6	ZBTB6
NUP188		TNFSF14	RNF207
NFKBIB		DMTF1	KIRREL3
LRP5		GPAM	ZNF212
AOC3		TBC1D14	ZNF343
FLJ10038		SMARCE1	KLK6
ZDHHC23		C20orf7	PHACTR4
PTPN21		SULT1E1	SLC22A2
BNC2		C2orf72	IGF2R
A2BP1		SEMA6D	SHH
ANKMY1		TAPT1	ERGIC2
EGR1		DACH2	HTT
C6orf97		SET	FGL2
C1orf25		RPRD2	TNNC2
RBM43		GPR109A	TNNI1
SMEK1		AIFM2	ZNF770
TXNDC11		PCSK1	ZNF771
NECAP1		SMUG1	KRAS
IQUB		AMMECR1	SERINC2
SUV39H2		SLC25A44	BRWD1
LOC400759		SYS1	MAL
MCM10		CCDC142	MAG
SLC25A15		GINS3	CCDC85C
CCDC21		PRICKLE2	RP11-702L15.2
SPATA3		KIF1C	ZNF544
CHD6		TMEM155	YRDC
PARP11		PTPN20A	UBE2Z
EIF4E		NDUFB4	LRRC73
RPS3		DNMT3A	LRRC8B
C8orf59		RNASEL	AP003774.4
ZNF589		CSF3	AP1B1
C1orf162		ABHD12	FBXO6
PDGFRA		SRCRB4D	RBL1.1
CHURC1		PPAPDC2	RBM11
NETO2		LARP1	RBM12B
C20orf27		BACH2	RBM14
ZYG11A		C10orf55	KIAA1024
ASAP3		TBL2	SLC25A25
RCAN1		XG	KIAA1644
ZEB2		SP100	AC007390.5
OSBPL3		DDX3Y	AC007919.2
STAT6		CSNK2A2	VIPR1
LCA5L		UPF1	ZNF324
POGK		LHX4	YTHDC1
NUP88		C1orf198	GCNT4
RPRD2		TP53AIP1	MAPK8IP1
MANBAL		TUFT1	TRHDE
KIAA1467		PTMS	TRIB1
FAM183B		PPP2R4	TRIB3
TARBP2		C1orf177	TNFRSF17
SLC25A30		IGF2BP1	SIRT3
ZNF346		UBASH3A	SIX2
TMEM49		DRG2	SKA3
FLJ39061		LIX1L	SKAP1
CALU		ID4	CHMP4C
UBE4B		MGST2	SMIM1
CAMK2G		PRDM16	ARF4
LRRC37A4		FCRL5	KIF1A
C22orf46		ZNF418	DLX1
PHF20		FAM46A	UBL4A
LGALS8		CCDC68	KIAA1658.1
MAGI1		DDHD2	NTRK2
PKHD1		FAM184B	NTSR1
C1orf177		PCLO	CTB-186H2.3
PPP4R1		XKR8	CTB-50L17.14
KIAA0513		RAB12	HEATR3
PKN2		IL34	AL355149.3
CD1D		PPP1R12B	C6ORF223
C13orf37		SLC17A7	SGK3
DLEU2L		TAS1R2	C1RL
DDI1		PCDHA9	C20ORF118
PPM1E		PRPS1	OR56A4
FAM92A3		C1orf115	NDUFA4
CHTF8		TMED7	CNRIP1
HMG20A		PPM1E	CNST
LRP11		CCT6P3	CNTD2
LOC158435		IGSF8	EIF1AY
ZNF880		ZNF626	DNAJC18
MAEL		CSF2RA	AKIRIN1
SMARCC1		CACNB3	MMGT1
LOC641298		CYB561D1	IFIT5
E2F7		TBC1D13	IFITM10
FMNL1		PPAPDC3	IFT43
ACADVL		TMEM87A	IFT46
DUOX2		KITLG	PSMB10
FAM22D		TBC1D20	PSMB2
TFR2		CLMP	FGD4
MBTD1		C17orf39	ZNF81
PKDREJ		PDPK1	TLR4
PTF1A		ICMT	TM9SF4
C1orf43		CYP1A1	TMBIM4
NR1D2		CYP4A11	KIAA1715
CLK4		CCND2	PGAP2
OTUD7B		GTF2IRD2	EFNA5
ACSL5		TOP1P2	EFS
TMPPE		ACER3	AL590714.1
PLXDC1		ZDHHC2	PRDM15
DICER1		TPM3	KIF3C
IP6K2		GRRP1	FLJ20306.1
TMEM128		BST1	FLJ20373.1
DNM3		TBX18	ACTL10
TRPM3		RAB23	PPARA
BTN3A3		SLFN13	VASH1
EGLN1		PAFAH1B2	DMKN
C1orf112		DUSP13	DNAH10OS
C15orf54		RPL28	DNAJA1
STRADA		MYOCD	DNAJB14
TACR1		CCDC66	DNAJB2
VIPAR		CBLB	DNAJB7
TBC1D13		NETO2	DNAJB8
UBA6		C3orf63	CRH
FMO2		FBXO25	TACR2
ZER1		CEP97	TADA1
HDGF		ADC	TADA2A
LASS3		KCNK5	TAF1A
LOC729678		ANKRD36BP2	FAM102A
JMJD7		GRAP2	FAM102B
PADI1		MRPL10	RP11-723G8.2
42803		BANF1	RND2
ABHD12		SRGAP3	RNF11
MFSD5		SLC41A1	RNF111
FGFR1		RCAN1	DLG5
CDK12		RAB9A	ASRGL1
NTRK2		ROCK1	ASXL3
CACNB3		MAP2K4	RP11-363G10.2
ELK1		LRFN2	PQLC2
NTNG1		SLC20A1	PQLC3
ZNF638		XBP1	PRAM1
CD86		GEMIN7	PRAMEF11
VTA1		ITGB3	PAPL.1
FAM153A		ARHGEF10L	SIDT2
PTH2R		GPATCH8	SIGIRR
GLYCTK		PITPNA	MLN
LOC80154		TOM1	MMAA
DCAF12		UNC5D	MMACHC
CTXN2		BHLHE40	MMD
RGS3		METAP2	MMD2
GATAD1		RUNDC3B	UGCG
TCP11L2		C1orf183	USP54
BCR		ACP1	SLC19A3
IL13		NOTCH3	STAT5B
POM121		BTN3A3	KCNJ12
CNKSR3		NISCH	KCNJ16
C11orf48		WDR1	SPRED2
TMEM179B		HSD17B10	PTPMT1
TMEM39B		GAN	CXCL5
GOSR1		CSNK1G1	FOXD3
UBXN2B		DIO1	FOXI1
RNF216L		CYP2A6	RALGPS2
SREBF2		ZNF592	DOCK1
TSPYL5		ANXA9	FBLN2
DIO2		NOTCH2	ATG9A
SCARNA6		FAM71F2	ATL3
MKI67IP		SLCO3A1	PECR
PROSC		FDXR	CCL5
GTF3C2		FAM102A	CD36
RICTOR		VEGFA	CD3D
KIAA1012		BMF	RAB32
VSTM2B		FNDC5	HTR3B
PACRGL		PDXDC1	CALCOCO2
ARHGEF7		GABRB1	PLEKHD1
ZNF493		WSB1	HMGA2
TBX3		GNL3L	HMGB3
NDRG3		CEP85	NUDT16
SPINK5		FAM179B	PGAM1
MGC131512		AMAC1L2	PGAM4
GIGYF2		SH3BP5L	DTWD2
KIF1B		LAS1L	ACY1
SLC12A5		MED22	ADAD2
MAPKAP1		RAB11FIP5	CYP51A1
AHSA2		ETNK2	CYP8B1
ERGIC3		WDFY3	ZBTB40
GLT8D1		C10orf27	GNG7
ZFHX3		PPYR1	FAF2
SLC30A4		NLGN3	CPSF3
ITGAV		GAGE7	SAV1
LGR5		SENP1	LLPH
APPL2		CLEC2A	CAMK2A
PLS3		ITGAX	CAMK2B
ZNF616		FANCD2	FAM216A
DCTN5		PLP1	SORBS1
CCDC149		H1F0	WNT3A
MRPS7		MAL	ELMSAN1
ADAMTS9		CEP63	TGM4
PDCD1LG2		PTPRB	TGM6
RAPGEF3		C18orf19	ZNF619
C2CD2L		KIAA0174	ZNF620
CXorf23		SYCP1	FOXK2
EIF2AK4		ADAD2	SLC39A8
WNT9B		NAV1	DHFR
H2AFJ		LCOR	POLR1E
C12orf36		COBL	TBL1XR1
RFFL		RNF207	ASCC2
MUC21		STK19	ASCL1
CD302		RGS3	NOS1
SLC4A4		TMEM174	SLC46A1
RAB11FIP5		IGFBP4	CD151
42800		RNASE11	TBX20
SNRPN		C15orf54	CEP85L
IRAK1		PHLDB1	ANK2
C11orf82		ZDHHC18	NFATC2IP
AASS		SYDE1	RORA
TEX2		ZBTB33	RP11-1099M24.7
C19orf34		ADORA2A	PPM1L
SAP18		GHSR	MRPS17.1
GPR45		RMST	CTD-2535L24.2
KLHL15		CCDC106	CTD-2545G14.7
RORA		C2orf64	PPFIA3
GEMIN7		EPC2	QSOX1
LSM11		MBNL1	PHF20
FAM135B		VMP1	CD300A
PLA2G7		SLA	PGAM5
UBE2E3		CDSN	SEC24D
ZNF785		GAS8	SEC31B
MED31		CYB5B	DDOST
MRE11A		CLEC10A	MAP2
PRDXDD1P		CNIH2	B4GALT1
SLC4A8		SF3A3	MYD88
GUCY1B3		VTA1	ADAM28
PRMT1		EBF2	ADAMTS12
C14orf118		ARL13B	KL
ABCA1		POU5F1	KLB
FAM71F2		NEK8	GABRE
CASP4		PARP16	ZSWIM6
METAP2		GLUD1	ZW10
MFSD4		XRCC2	ZWILCH
DENND3		PAG1	LGALSL
DISP2		SULT1C4	ATCAY
FNDC5		PKDREJ	ATE1
AATF		RANBP6	SPSB4
AHCTF1		ZNF595	ANKS3
LOC255187		ERN2	DUXA
DNAJC16		B3GALT2	MSH3
HECTD1		ZNF136	TEK
EIF2A		TP53INP1	TEKT1
KCNJ2		TOMM70A	THBS2
CCNJL		PTPRK	THEM6
METTL6		ARHGAP20	ZMYM2
LIMK1		ZDHHC22	MUC13
FOXH1		HEXB	ARCN1
CYP51A1		SEPHS2	TSPYL4
WASH2P		CLDN14	INHBA
ARHGAP20		AMOTL2	JAM2
PPP1R3D		MEGF9	POLR1A
OLFM3		TPM4	TMEM236
RIMS3		SOCS7	DSTYK
UPF0639		RANBP17	ZNF547
PISD		FAM53C	TPPP
WASH7P		MRAP2	TNRC18
HS2ST1		PTPRH	TNRC6A
FCRL2		SNRPD3	TNRC6B
LCA5		TIMM13	EIF2S1
SLC13A5		MGAT3	EIF2S3
LRRC23		TMEM64	RAB11FIP4
ARMC3		ZER1	RAB11FIP5
HMGN3		DGCR10	RAB12
SHISA4		PTPN21	TNFSF9
DLX1		DDI1	NSUN4
CALHM1		HCP5	CD68
GOLGA6L5		TSPYL5	ZNF705A
NBPF10		MAP7D3	PTAFR
NBPF8		WDR5B	PTBP3
PRPS1		RNF216	GRAP2
FLJ43390		PRSS35	RAB27B
KIF4A		SCN5A	RAB2A
PPP1R10		TP53RK	SIRT1
PLDN		FER	CUL4A
CLIC6		C19orf12	DHODH
TRNAU1AP		CELF3	DHRSX
GPAM		PPIP5K2	CHRNB1
NRIP3		LRRC61	CHRNB2
UBE2R2		B3GNT6	ST3GAL1
RSPO1		DOCK9	ST3GAL2
DSP		WDR33	ST3GAL3
VTI1B		NEDD9	EXD3
NUS1		FCN2	MYLK4
ABCC3		ZCCHC24	MYO15A
RDH16		LOC728342	FARSB
COQ6		PARD3	RP11-111M22.2
HLA-A		ZNF680	TMEM189
UTP23		RABL3	PDPR
MAFF		LOC100128262	PDS5B
COL4A3BP		AEBP2	PAQR3
VASP		STK11	KIR3DX1
LDB1		MAPT	KIRREL2
C21orf94		CSRP3	HIRIP3
XPNPEP3		ARF1	HIST1H1T
GPR68		ORM1	HIST1H2AL
HDGFRP3		RBM33	SETD5
C3orf37		RXFP1	SETD7
C10orf76		DCTN5	DEXI
AFF1		MLN	U2AF2
MT1B		MAP7D2	PA2G4
POLK		ADRB1	CSRNP1
ESPNL		DEDD	ANKRD23
C11orf75		BARX1	ITGA8
SPTLC3		DUSP7	SLC6A6
USO1		SMC6	SFTPD
CLIP1		LDLR	USP31
KIAA1826		KLHL34	MDFIC
CLCN6		CFL1	MDH1B
ZNF84		POU2AF1	MDH2
RIF1		ACVR2A	MDM2
ERMP1		CCBL2	RAB21
ZFAT		RPP30	CALCR
ABCA4		CPNE8	KIF3A
TBC1D23		NTN5	CCDC132
C14orf23		FBXO39	RAB23
ZNF45		KREMEN1	COG7
C7orf61		ZNF707	TRGC1
ZNF345		LOC728323	Z98049.1
KIAA0319		PIGH	ZADH2
SERF1B		SUN2	TRPC5
PHLDB1		ARMCX4	SUCLA2
C2orf64		NOC4L	PA2G4.1
LUZP4		KIAA0889	CCDC140
CNTN5		KIF4A	GRK7
TACR2		MAGI1	FAM123B
STIM1		42798	TPRN
ZBTB33		FMNL3	CCDC170
SMOC2		ACTR1B	CCDC174
FUT11		WIPF1	SLC44A1
ALOX15B		NIPAL3	FITM2
ZFYVE9		ATXN10	FKBP14
CYP11B1		NAPEPLD	ADH1B
PGGT1B		ALAD	TAX1BP3
NUP210		AS3MT	MYT1
LDHAL6A		ACAD8	ZNF660
MYH11		VAC14	MAPK7
PRSS35		DICER1	NDUFS2
ARHGAP24		TMX3	NEBL
TRAF1		C6orf15	NECAB1
DNAJC25-GNG10		LRRC38	NECAB3
APOL1		FAM105B	NEFM
MSH2		TMEM63A	NEIL1
LIN28A		APH1A	PTGDR
GLCE		BBS9	PBLD
CUL5		NGLY1	PBOV1
HMGB3		HS3ST2	VMA21
ZMYND8		AKAP6	VMAC
MFNG		DUOX2	TEAD1
EDNRB		MOGAT3	KCNJ2
OTUD5		PBOV1	ANKRD9
GRIN2B		SLC30A4	ZNF101
MAP2K7		LOC554249	TRPM4
MDN1		ITGAV	MFHAS1
GLIS3		KIAA1737	PURB
LRP12		C14orf180	WDR5B
GNG10		VPS26B	WDR6
STK38L		ZNF621	ALDH8A1
POU3F2		RGL3	CMTM6
TIPARP		PIGK	AL096677.1
RAPGEF5		ABCG5	PDP1
CES2		CCDC150	CTD-2583A14.10
SNORA36A		SNCAIP	LIPH
SH3RF1		NLGN2	DLX3
SYF2		GNB3	SYTL2
NUPL2		MFSD5	FAM216B
RPS6KL1		PRKACB	FRMD4A
PRAMEF10		AHCTF1	SNX7
RACGAP1		SRSF2	BAZ1A
UBE2CBP		PPP2R3A	ZNF154
UBE2A		ZNF708	FAM174B
C10orf122		DKC1	FAM177A1
STUB1		ANKRD45	FAM180B
NCAPG		YAF2	FAM184B
RGAG4		OBFC2A	FAM187A
ESAM		ZNF37A	FAM189A1
PRR18		C3orf72	MOB1B
EDA		NEK11	MOB3B
VPS16		DYDC2	FHDC1
ROS1		UBE2CBP	FHL2
LAS1L		REPS2	CDK5R1
P2RX6		TSC1	SH3KBP1
OGFOD2		TTYH1	SIAH3
PITX2		DRP2	OR6P1
ZNF542		SNIP1	OR6T1
SLC46A3		SLITRK6	SCN11A
ATP13A4		WDR17	SCN1A
TMPRSS4		CPSF4	CPA1
KRTAP1-1		ATAD3A	CHIC1
LOC440910		CROT	ZNF716
MORN5		ALOX15B	TMEM179B
FLJ43315		GMCL1L	TMEM181
KDELC2		ZNF768	PDCD1LG2
ARL6IP1		TMPPE	KLRD1
DYNC1LI2		C1QC	SLC2A5
DDN		PWP1	PRR11
HEG1		ROM1	EP300
PAPD4		SF3B5	RNF123
C11orf92		ENDOV	TNFAIP2
NAPA		UBE3B	ATP5G3
SVEP1		NCAM1	ATP6AP1
HNF4A		MAP3K3	PCDHA10
APOL2		IFI44L	PPM1F
KTN1		TTF1	STAT3
CEACAM1		KCTD16	RP1-139D8.6
PABPC5		RDH16	RP11-429E11.3
GOLGA6L1		SH3BGRL	CBX3
GHRLOS		THPO	NDRG3
FLJ44838		CLDN12	NDRG4
L3MBTL2		CAPRIN1	NDST1
SUFU		C16orf45	SMURF1
WHSC1		LOC728485	RABL6
SOCS7		HRCT1	RACGAP1
ELMOD3		KCNT2	RAD1
UQCR11		GCOM1	FAM157A
CNR2		EXD2	KIF14
CBY1		LOC441259	LYSMD4
PHF15		ZNF525	PNOC
UNC119		EPSTI1	PDCD6IP
AFF4		PEA15	ATP13A3
FOXO4		TNNC1	TRIM2
JPH2		TAT	AP000974.1
SLITRK6		RACGAP1	ZNF510
ZCCHC24		LOC100132891	ZNF516
GLCCI1		FAM73A	ZNF518B
PTGIS		IRAK1	SLC35G3
TMEM191A		MYO1C	ETFDH
LOC100129104		FDX1L	SORCS2
KRT79		ZADH2	PPP2R3A
LOC728640		VIPAR	CLDN18
CSF2RA		HELT	IL17RA
MAPK1IP1L		ZNF322A	TSPO2
RANBP10		CYB5RL	NBPF9
ACD		TTC21A	TMEM159
TMEM155		GSK3B	WDR33
RBMX2		SHROOM2	WNT2B
NCKIPSD		AKAP10	TAS1R2
ZFP62		AMAC1	TAS2R19
AKNA		CNR2	JMY
C10orf44		ERC1	GPR82
DIS3L2		SPTLC3	GGA2
DDIT3		RBFOX3	C22ORF43
TMEM188		DLST	C22ORF46
MYOZ3		SYPL1	C2CD2L
KBTBD10		RPS6KL1	HSH2D
ZNF273		POPDC3	HSP90B1
DOCK1		PROSC	ZNF626
DNAJC9		RSPO1	ZNF629
BMP2		TUBA4A	ZNF641
TOE1		NUP133	ZNF644
IARS		PCBP2	F2RL1
GALNT1		IPO9	ARPP21
RNF170		FCRL2	AL137798.1
ORMDL3		CRTC3	UBN1
ZCCHC17		SLC22A7	UBOX5
GNB2L1		RUNX1T1	MLLT4
NISCH		C2orf68	ZNF563
CES4		SLAIN2	ZBTB10
WIPF2		SMARCC2	RHBDD1
IL17A		TNFSF11	RHBDL2
KCNJ10		HDGF	RNFT2
FAM102B		RMND5A	SP6
C12orf29		RAB8B	FAM82B
PSKH1		ARHGEF7	FAM83E
AGBL4		PDE7B	FAM84B
SUGT1		CD274	FAM89A
MAP1B		MAN2A2	GSPT2
B3GNT3		LAMC2	GSR
OLIG3		MAPK9	GSTM3
XKR7		IHH	GSTM5
GLT25D1		HSPBP1	GSTP1
SCD		CDK5R1	NANP
FER1L4		HPS5	ABCB8
FEZ1		CTAGE11P	APOL2
LOC645700		HTRA1	HS3ST3B1
TRIM2		C11orf75	RNF152
PEX1		TCTEX1D1	ABCD1
RHOBTB1		KCNE4	ABCD2
SLC6A12		BBC3	ACRC
TLE4		MYCT1	ARSK
SRGN		PGP	RNF135
FLJ46361		PPFIA1	HOXC6
OR11A1		MBNL3	HOXC9
PVRL2		THUMPD3	CPT2
ZADH2		PIRT	MAPK9
C21orf45		MEPCE	GP2
ZC4H2		IGF1R	TFRC
COL4A4		SRRM2	ZNF335
TMEM150C		ARHGEF40	QKI
C11orf76		NTNG1	DKFZP434A062.1
CCDC30		OLIG3	DKFZP434E1119.1
H19		GAP43	DKFZP686J19100.1
YAF2		FKSG83	DKFZP779L1853.1
KCNK16		ZNF609	GOLGA6B
GPR111		SRGN	CYS1
TTC23L		UMODL1	SLC39A7
NUCKS1		C14orf70	MYH10
MAP3K9		HERC4	HIF3A
SLC22A15		SLC33A1	CD164
PTCH1		SRRM4	CD177P1
ARAP3		ZNF192	CD226
LOC645166		NANOG	SLC5A3
ENDOU		CTIF	RP1-177G6.2
ANTXR1		CACNG6	CTD-2267D19.3
C9orf30		TRNAU1AP	CTD-2331H12.6
GOLGA3		TIPRL	MAP3K11
CNST		USP8	XAF1
DENND5B		PKN2	XBP1
RAB40B		RGS12	SLC6A20
TM9SF1		MAMSTR	CXORF38
ZMAT2		C6orf204	CXORF48
GCET2		LBH	CXORF56
ZNF853		SLC17A8	CXORF59
FRMD4B		FUT1	CYB561
CNGA3		ACOT11	CYB5B
NLGN3		ZFX	CYB5D1
CCDC64		POLR2H	AP3B1
LIPH		C6orf176	LCA5
KCNN3		STK38	LCE3D
ATAD3B		FAM180B	PALLD
NALCN		LRP5	PALM2
SETD5		PSMC3IP	POFUT1
NCRNA00183		POU3F2	MMS22L
POPDC3		C12orf24	ITPR1
SKAP1		RPL7L1	DCAF10
E2F3		C13orf38	HIST2H3D
ADPRH		MYLK2	HIST2H4A
ZSCAN12		ABHD11	HK1
SPATA5L1		GABRD	SSX4B
KCNK9		B3GNT3	SSX5
CYP1A1		HDAC7	WDR82
CRLF1		NMI	WDR91
ADORA2A		IL19	NARG2
C19orf41		SAP30L	CLCN7
DNTTIP1		C12orf65	CLCNKA
LRAT		THY1	ITIH6
ZNF280C		CNTLN	MOXD1
FBXW11		EIF2A	SNED1
FAM111A		NBL1	C16ORF70
POLH		SLC6A6	NBPF3
SMCHD1		VILL	EXTL3
SIRT1		C1orf200	FAM64A
FGFR2		PDE4A	FAM65B
COQ9		SLC4A4	FAM71A
MRPL30		CDK14	ZNF528
ZNF730		CHTF8	CACNA2D2
WASH3P		ZNF784	CACNA2D4
C16orf53		C22orf46	UACA
LOC285735		TMBIM4	ANKS6
KIAA0913		C20orf27	TXLNA
FBXO11		ACTR1A	TYW5
FAM66C		SLC45A3	SNX8
ELOVL1		KCNK2	NFATC1
CASC2		FOXRED1	ZNF225
C2orf89		ASCC1	ZNF229
SFRS8		RAF1	ADAMTS15
TTTY9B		DPP10	EML4
OPA3		CYP2B7P1	LYRM7
WDR36		TEX2	PAMR1
PAFAH2		DGKE	ZYG11B
APH1B		C1orf109	SLC8A3
ARRB2		SUFU	INHBB
YLPM1		UBE2Q1	INHBE
GTF3C3		GALNT1	INMT-FAM188B
SERF1A		ATAD3B	ZFR2
NSFL1C		BAALC	STMN3
ADAMTS19		MTL5	STMN4
VTI1A		SLC2A1	STOM
PTOV1		NSFL1C	STON1
ACCN2		ZNF45	FAM58A
DYT3		STYX	KIR2DL4
C12orf35		OPRD1	DYTN
PLIN5		SLTM	CREBBP
DUSP3		PCDHA4	PHF21A
ZNF454		N4BP2L1	SAYSD1
SLC35A2		PCDHA5	SBK1
HPS5		TMIGD2	SBNO1
LOC100133091		ARHGAP24	DTD2
VAMP2		HES1	ARID5B
TTC33		FOXN3	SETD1A
TRIB1		PATZ1	SETD1B
FAM65A		PCDHA13	LRRN4CL
NOP56		ZMYND8	C4ORF50
ATAD3A		TACR1	CLDN1
ITGA10		PTPRN2	CAV2
HNRNPA3		LPO	TRIM58
RHBDF2		C1orf172	OLA1
GRK4		NXPH3	OLAH
CCDC140		GCNT3	OLFML1
LOC157273		KCNK16	ADAMTS5
HNRNPR		CNGB1	C20ORF194
FLJ30838		NDST1	C21ORF128
PATZ1		UTP15	TP53BP2
FLJ45949		CREB5	AGPAT5
BTNL9		SENP6	AMOTL2
PHLDB3		SUMF2	CASP2
WRAP53		DCDC2B	NAT8L
RHBDD1		DUSP5	TRAV23DV6
C14orf43		GORAB	SAMD14
TCEB2		SLC20A2	TMED7
NOL6		CCDC69	SIGLEC6
NID1		CCDC130	SIGLEC8
EHD1		KIAA1467	SIK2
C4orf41		ADRB3	SLC17A6
TMEM111		ZNF226	GRID1
NXNL2		AFF1	NTN5
BRD1		MTCH1	NTNG2
LPP		NEK10	COPZ1
TMC7		SLC25A30	OPN4
C2orf88		ALS2CR8	RNF2
HACE1		C19orf42	RNF14
EIF4H		PDGFRA	RNF141
METTL11A		PTK2B	EPB49
STXBP6		SLC10A2	BAAT
ZNF425		MYCN	TOM1
RAB15		APOB	TOM1L2
C1orf120		DDN	TOMM40L
PTPN12		SLC32A1	TOMM7
FAM46C		MCM10	NYNRIN
LOC149620		BTN3A2	O3FAR1
CDC73		PARP11	RAB3IP
TPST1		MTMR6	MYO7A
ZNF28		ACTR10	ENOX2
RCSD1		RHOBTB1	ATP11A
ACTR1A		FAM83D	PPP1R3D
KLK10		OCRL	CCDC104
CSNK1A1		ZNF257	C9ORF64
PPARG		CADM3	RPE
C10orf10		MAP1LC3B	FAM198B
KIF4B		TFR2	RPL3L
ICMT		LOC503519	GPR161
ACTC1		GCHFR	GPR180
C1orf183		TTC33	PGR
NAP1L1		KBTBD3	TMEM203
LOC646736		PCDHA1	CALN1
APBA2		ARIH1	KITLG
TOMM40L		SLC25A13	FBXO32
TRIM72		CNTROB	SERF2
FBXW7		PCDHA2	C6ORF100
SART3		PCDHA3	PDHX
DVL2		ASCC3	SPRN
PEX7		TMEM194A	RECQL5
LOC286299		PCDHA6	ADCY5
KIAA0907		LRRC19	ADCY6
ADRB3		PCDHA7	EIF5
TGFBR1		PLXDC1	TCEB2
C17orf99		FBXO6	TCEB3
HDAC6		PCDHA8	USP38
APTX		PCDHA10	SLC22A23
VAPA		PCDHA11	SLC22A3
OSCAR		PLOD1	SLC22A7
LASP1		NHS	TEX22
C9orf64		PCDHA12	ENDOD1
ARSI		EIF2C4	ENDOU
CALML4		FAM19A2	PSD3
LONRF1		PCDHAC2	WDR1
PLEKHA2		ZNF430	METTL12
PRRT2		DNAJC16	PDXK
RAD23B		GABRB3	ZMYM5
GSN		IQUB	CD63
LILRB4		C7orf31	TBC1D24
BAT2L2		ARRDC2	VMP1
CABP5		UCP3	LIFR
NFAT5		IARS	LILRB4
BEND7		MC2R	HERC3
IGF2BP2		LGALS8	FDXR
KIAA1609		QTRT1	ZC4H2
ERAP1		PPIL4	ZCCHC14
SRGAP3		TNS3	PGGT1B
VPS45		RGS7	PGK1
LOC90586		SMEK1	FAM126A
FAM176A		TET1	TRAPPC1
BTAF1		PRDM4	TMEM209
C3orf65		GDPD1	TMEM211
HK2		TRIM68	C11ORF70
TRIM29		SNX30	KLF2
HSD17B7		CCDC43	PAPD4
FAM129C		BTN3A1	PAPD7
C14orf105		TREML4	TAF1D
THG1L		ZSCAN29	TAF4B
LOC202781		PABPC5	TAF5L
C1orf204		FAM189B	CTC-203F4.1
COG6		RAB3IP	CTD-2014B16.3
ILDR1		SDR16C5	CPM
MAGEA5		PIPOX	C6ORF15
PCA3		MAFF	TUBB
AMOTL2		GTF2E2	PIK3R5
C8orf46		FAR1	GNL1
GREB1		KBTBD10	GNL3L
PFKFB3		SLIT2	GNPDA1
F11		TOP2A	GNPNAT1
INPP5B		ATP6V1G2	MYCN
NBPF11		SSBP3	ITGB3.1
SFRS2IP		SMU1	ADRB3
C9orf44		KRR1	FPR1
ATP6AP1		DUSP3	FPR2
SNRPD1		RAB27A	MTRNR2L4
TXK		NCEH1	TREX2
LOC100302401		ANXA4	PAX5
JMY		NEXN	AMZ1
AGGF1		SF3B4	SYPL2
BTG1		ZNF514	KATNBL1
ZNF197		API5	KAZALD1
WDR73		ZNF449	PNPLA3
MMADHC		SNAPC3	PNPLA4
PTEN		C3orf21	TRAF6
KIAA1274		RFWD3	TRAJ19
KANK4		ADCK3	SLCO3A1
AP1G1		CXCL3	METAP2
LOC100128098		UHRF2	SS18L1
TARS		PARP1	SSBP2
WIPF3		OSTF1	ZNF391
TCF25		ARID5A	ZNF394
AP4E1		APOD	TTC34
MGC2889		RALGAPB	LNX2
MAP1A		TRIM47	MAP4
POFUT1		STAT1	MAP7D2
CHD2		F11	PDZD8
USP1		HERC2P2	KLC1
LRRC2		GRIA4	EMC3
RNF2		UBTF	RP11-48B14.2
UBE2Z		BET1	RP11-276H1.3
FAM179B		HOMER1	RP11-287D1.3
C14orf179		PLA2G12B	KIAA1244
FBXO22		ZNF160	UST
LOC152225		ZNF527	ITGA7
EXOC7		PLDN	RP11-382J12.1
FAM180B		ZNF667	CASQ2
PDIA3		GRIN2B	IKBKG
ZNF226		ITSN1	IKZF1
LOC100288077		SPATA2L	ZC3H6
BAI3		SLC48A1	SMC1A
CD36		ABCA17P	WNT10B
NCALD		LASP1	WNT11
SFRS5		NAA50	DAPK3
DRAM1		SMAD3	DAZ2
TBX15		SRI	DAZAP1
SLC6A2		NCS1	NFIA
ABHD4		C20orf196	PHF3
SMEK2		CTC1	CCDC88A
C16orf87		AAGAB	UBE2N
ZNF90		CD36	BMF
NPAT		SEMA5B	FOXL2
IFT57		PIGV	SPRY3
CAPRIN2		ADRBK2	SPRY4
LOC400680		FGF14	EVC
PEX6		KIF7	NAA40
METTL2A		EXOC8	NAMPT
TOMM5		SLC6A2	SLC34A3
GRWD1		RNF133	SLC23A1
ZMAT1		ACAD9	ENOX1
ZNF187		PAK1	SLC26A2
PCDHA13		METTL14	SLC26A4
PCDHA5		HLA-DOA	SLC26A8
PCDHA4		SSR3	WIPF3
C8orf74		IPO11	TAF7L
LOC100130354		RILPL2	TAGAP
TMEM50B		C11orf74	TAL1
QTRT1		C1orf187	VANGL1
STAT4		ESYT3	LHFP
GLDC		HSBP1	LHFPL4
AKAP2		GIMAP1	SRPX2
GNPDA1		NUP54	ZNF705B
ARMC7		CLDN20	ZNF705D
FMR1		YPEL2	ARF5
PSMC6		AKNA	C1QTNF6
PTPRK		SBSN	VWC2L
SMYD2		EIF2C1	OVOL3
P2RX7		PTF1A	OXCT1
C9orf9		LGR5	OXNAD1
ZNF490		JUB	DCUN1D1
PALM2-AKAP2		DYSF	SOX11
RCE1		METTL3	TNFRSF1B
MCCC2		NEK3	TRIT1
LOC100128885		C3orf37	PTCD1
ITGA1		C7orf11	PTCD2
ARHGEF10L		SIRT1	PTCD3
SLC35E3		PIK3R1	ZFYVE9
FRMD4A		UBXN2B	ZG16
MXI1		NICN1	FBXO9
FAM160B2		NGF	CDCP2
DAPP1		TRAM2	STK40
ZDHHC22		TNNC2	ORAOV1
MYST4		NMT2	SPECC1L
BHLHE40		GOLGA3	RHPN1
LSM14B		PID1	ING3
LMTK2		TCEB2	PLAA
FN3K		SPTLC2	PGM1
TP53INP1		PPP1R16B	KLHDC7A
GRAP		GZMB	PPP1R16B
ALS2CR8		COL11A1	TECPR2
MRFAP1		LIMS1	EZH2
PGP		MADD	UBE3B
FAM117B		VPS13A	TRAJ43
PPAPDC3		TMEM41B	MARK2
C9orf122		UBXN7	MARVELD1
ZNF518B		EHMT1	MARVELD3
SYN2		COLEC10	MASP1
HLA-F		FMO2	MATN1
FGFRL1		SPECC1	AFTPH
ACAT1		ZNF786	PLEKHG5
SIGLEC11		KLK10	PLEKHG6
MCM3APAS		TIMM8A	PLEKHH1
TSPAN9		CHRNA3	PLEKHH2
UPK1B		EIF3B	SPTBN1
FUT1		YIPF1	SLC30A6
GPR161		EEF2	SLC30A7
INTU		POLG2	SLC31A1
ATF2		ADAMTS4	TMEM125
PPP2R1A		ERLIN1	UPK1B
NCAPH		DIO2	UPK3BL
CPEB4		LSM14A	PGPEP1
NUDCD3		GRID2	RNF170
SLC5A9		RNF141	RNF181
KLK11		ZFP3	BBX
DACT1		TSPEAR	BCAR1
PI15		PRKCA	PTF1A
FAM91A2		C2orf63	MED19
GATA3		MAP3K2	CTD-2215E18.1
SCUBE3		U2SURP	TFAM
TMPRSS11BNL		PMPCB	TFAP4
TMEM85		PLEKHO2	PPFIBP1
UCP3		SPCS3	KIAA2026
ZNF189		LAD1	RINL
CD1E		ALDH2	TCF7L2
PSMB9		RSL1D1	TCTA
SMYD1		ZFYVE19	TCTE1
FAM71C		SLC6A3	CLK1
FBXO42		CD109	CIITA
MSL1		SLC38A7	NAIP
FAM170B		DVL2	SLC8A2
LMAN1L		CCDC140	SORT1
POLDIP3		FN3KRP	THTPA
VTCN1		PROP1	CACNG6
CARD14		ABI3BP	SENP5
DMP1		SUPT16H	TCAP
TTC1		WFDC10A	ZNF461
C14orf25		SLC35E3	ZNF470
PLOD1		DUSP12	MGAT2
RGS6		PER1	SP7
CSNK2B		LRRC2	THAP10
TTLL12		MDGA1	THAP2
LRRC10		SMARCC1	THAP6
CELF4		ADRA2A	TRAPPC10
CHPT1		CLEC2D	EFCAB11
HSD11B1L		IFIH1	C12ORF77
TRIM41		FBXL19	C14ORF1
NR1I3		UBTD2	MXRA8
FOSL2		CYP2S1	MYADM
FRMD6		C17orf60	MYB
GTF2H4		ZNF862	CST8
ENPP3		SLC25A15	TMEM194A
TTC25		WAC	NLN
ADARB1		P2RX7	NLRP7
PRMT3		CD44	ZNF333
EFTUD1		OBSL1	RP11-467N20.5
TET1		ZNF207	C14ORF101
FER1L5		WFDC10B	C14ORF105
ZNF526		ANKRD34A	C14ORF119
SQRDL		C8orf59	ERCC6
RANBP3		ALG13	SETMAR
THBS2		ZNF100	SEZ6
CXADR		TMEM92	SF3A3
NLGN4Y		C1orf162	SF3B3
BCL2L11		TRAF2	KCNA1
KIAA0895		ZNF445	KCNA7
EXOC6		ADRA1A	KCNAB2
DLEU1		CISD1	KCNAB3
GRAMD1B		FRMD4A	AP000679.2
TLN1		SGOL1	STXBP5L
MTA3		NYX	SLC6A17
EXOSC8		CRYAA	MPZL1
ZNF614		ZKSCAN4	IL19
EZH2		AZIN1	ETNK2
RPRM		NAIF1	OR4S1
SEC62		UNC119B	CERCAM
NBPF14		GAS7	IL36B
DDX5		C2CD4B	IL36RN
STAR		PREX1	NSFL1C
COMMD4		UQCC	TMEM246
C3orf21		CDADC1	GTF2IRD2B
C17orf69		STAC3	PISD
TALDO1		OSGEPL1	PITPNB
MARK4		MFF	ERVMER34-1
TRIM56		LSM3	ESAM
IGHG1		PIGR	ESCO2
UPF1		QKI	NBEA
MEA1		RRAD	NBEAL1
LOC158381		SART1	NBL1
LOC648691		RFX4	NBN
LOC550113		ZNF771	NBPF12
NLGN2		RNF125	GALNT4
PIPOX		TNFRSF10A	EIF4EBP2
TMIGD2		BHLHE22	EIF4H
MAPKAPK3		UPP1	C1QTNF7
DCAF17		MUC6	C1QTNF8
L3MBTL		RBM43	FAM199X
SCML2		ARMC10	GTF2IRD2
SERPINE1		KIAA1826	C2ORF72
PROP1		SIAH1	C2ORF80
C11orf67		CREB1	C2ORF82
REL		RAG1	C2ORF88
ZNF131		STAT6	COX6C
CCR5		ZNF248	COX7A1
CEP135		SAR1A	EXO1
N4BP2L1		FAM101A	EXOC3L2
COBRA1		USP5	EXOC7
DIP2A		VAV2	PSG4
AP3B2		ZNF793	TECPR1
FAM192A		GUCY1B3	TXNDC16
C17orf104		POLR3B	KRT74
PSMD3		FAM176A	ZBTB43
EIF4ENIF1		KAZN	GPD1
SLC9A11		TGIF2	PLA2G4E
KIAA0141		HMGB3	EPS15
PRDX5		TSPAN33	BTN3A1
KIAA0100		MAD2L2	DDX51
ZNF341		TSPAN9	C1ORF173
XPNPEP2		DCAF17	C1ORF177
LOC284023		RIMS3	C1ORF180
ZNF430		NDST4	DUSP10
CCBP2		ATG9A	FBRS
C8orf37		ANP32E	PI15
PARVG		CTXN1	AP3S2
SMNDC1		TAF8	AP5B1
AMAC1L3		TMEM41A	APBB3
MBTPS1		PHYHIP	APC
HOXD11		CERK	NCBP1
SNRNP40		FKBP4	SLC41A2
FAM22G		PEAR1	UNC13B
SLC25A18		PLA2G2D	XYLT2
LIMD1		GP5	YES1
EIF3J		PEX7	ALDH4A1
ALCAM		TCEA3	ALDH5A1
GPR137C		WHSC2	ALDH6A1
C21orf29		UTP6	NGEF
FAM19A2		CHD5	TTLL7
MAP3K12		MT1B	PTMS
FGF7		VAV1	PLEKHO2
TMEM107		TARS2	PLIN3
CCDC55		PPP1R14D	RPL23
SLC41A3		PNMA3	RPL26.1
DYNC1H1		G0S2	ZNF780B
TMCO7		LEKR1	ZNF783
STXBP4		APOBEC3F	SLC35A1
RIOK2		PGAP3	ZNF707
SLFN11		ZNF526	APOBEC3F
KLHL32		ECHDC2	SLX4IP
TMEM125		RLBP1	HMG20A
LOC642826		FFAR2	HMG20B
ORC5L		PRELP	STK36
SMA4		ETV6	VAPB
LHFP		ATOH1	GPR27
WDR92		CST5	GPR39
ST6GALNAC2		PYY	RP11-497E19.2
RAD54L		F5	RP11-507M3.1
TMEM159		ALDH3A1	B3GALTL
FAM154B		DAOA	NTRK1
TNIK		ARL4D	PTCH1
MYST3		UBOX5	TIMP2
PYGM		TAS1R1	STK3
PFN2		GDPD2	SCN4B
IL2RB		GPR88	ALDH1B1
CTNNA3		CRYZL1	ALDH1L2
SPOPL		ARHGEF10	ALDH3A2
PLA2G2D		ATP5G1	DAP3
TP53INP2		S1PR5	TMEM229B
ZNF238		ARSE	TMEM230
ATP1A4		ST3GAL6	TMEM231
CASP10		C5orf44	EIF2AK1
ARSD		TEAD3	CASP8
ZNF714		ARRB1	KLK15
NFASC		ADAP2	ARHGEF12
CSAG3		ZNF485	ARHGEF15
S1PR3		NBR1	BTRC
SGK494		CHURC1	SMAD5
PIK3R1		CALCOCO2	DIS3L
TAPT1		C9orf71	MVK
HERC5		RBM15B	MXD1
ARID4B		PIGM	DHX37
RC3H1		ARL6IP1	SLC25A29
USP49		APOBEC3C	DFNB59
TMEM20		LOC285043	SNRPD3
CRX		FAM84A	AKR1C1
DNAJC30		GGA2	MLEC
CD52		PRKCB	SIGLEC11.1
PCDHA12		GPR81	FAM46C
PCDHA11		IBA57	MAFG
PCDHA10		POU5F2	MAFK
PCDHAC2		MESP2	LUZP1
PCDHAC1		BCL2L15	LY6G5B
PCDHA6		HECTD1	PTPDC1
PCDHA7		PRKAA2	EP400NL
PCDHA8		TUBA1C	SERPINE1
PCDHA2		USP54	CCDC142
PCDHA1		BNC2	EMID2
PCDHA3		GALNT4	ELMO3
PCDHA9		CSPG4	FAM54B
C8orf83		BHMT2	SLC11A2
MAP3K2		PXMP2	SOX12
DDX50		CC2D2A	LNPEP
SNCAIP		ACBD4	AXIN1
SPNS1		CRABP1	MDM4
NAIF1		LOC387647	SYNGR3
PDSS2		MCOLN1	SYNJ2BP
GPR61		C1GALT1	SYNPO
ADRA1A		FCGR3B	IGHV7-81
ZNF200		ELAVL2	C1ORF54
LOC100130987		C10orf10	NAT2
AMAC1L2		FNBP1	AC017028.1
PPP2R4		DET1	HUNK
RPL37		LOC255130	USP45
NDE1		KLK11	SLC47A1
TGM4		AES	STK11
PPIF		RBMY1F	TNFSF14
TMED4		FXYD2	HLA-DOA
PTCD1		RAI1	UGGT1
CPD		B3GALT6	UGT1A1
LOC339674		PDGFRB	UGT1A10
ZNF470		NCBP2	UGT1A3
RND2		MTDH	ITM2C
BTC		ADIG	ITPKB
MTHFD2		ZNF66P	EEF2K
SNX6		PLAUR	IL27RA
SNRNP48		HNF1B	C16ORF54
LOC144920		C1orf112	C16ORF58
FLJ30901		GALNT10	KLHL30
RASAL1		ARL2	C2CD4A
GADD45B		E2F1	KLHDC8A
RAB30		DNAL4	CTDSPL
MAST4		C8orf12	EZR
C20orf199		TSPO2	F11
TNFAIP8		ZNF107	F2R
PAM		EGF	YIPF5
FGF14		GJC1	YIPF6
NOTCH2NL		POLDIP3	YKT6
GOLGA6L6		SLC7A6	DYNLL1
WIF1		SAV1	DYRK1B
ZNF720		VAPA	RBM43
SDR16C5		USP12	RBM48
OCIAD1		TOMM40	FOXK1
PHC3		CYP51A1	JARID2
FAM168B		ZYX	ZNF681
ADCK5		EML2	APH1B
PRELID2		C8orf46	CELF2
RSU1		MBLAC2	KCNE3
SNRPE		ASXL1	TTLL3
HCG2P7		SCN3B	ZNF326
ENKUR		HK1	BASP1
TTTY12		PANK4	MCC
NRL		TNFRSF14	NBPF14
CDC37L1		ZNF557	RNF169
C2orf63		CALML4	CAMK2N2
PRRG4		EIF2S2	PDZD11
SULT1A3		LCN2	MED22
VEGFA		PDZD11	SREK1
CAMK1D		BPHL	CHD2
KIAA0652		LHX5	XXYLT1
CCDC69		IGF1	NICN1
SYNGAP1		C6orf97	CDHR1
ACTR3		EDAR	DCAF16
GBGT1		PAPD7	DCAF17
HIST2H2BF		ABI2	C17ORF80
ZCCHC7		THNSL1	FAM129A
SLMAP		C20orf111	KLF7
RNF157		ABHD12B	ASPHD2
ADIPOR1		DIXDC1	AC115618.1
ZFR2		KRT79	RGS3
LOC100272146		CHKA	COA5
RP1L1		FRMD6	STC2
LOC441728		TRAPPC4	FUT6
XKRX		LIN28A	FXN
LOC100131496		RRM2	FXR2
SIGLEC10		CCDC149	ATG10
ZNF564		C8orf44	ATG12
GAS8		42803	ATG13
ATP7B		RNF145	ATG14
SNX18		TRPM3	ANO5
HDAC5		RPRML	ANO6
ARID1B		DCAF12	ANO7
KIAA1841		EHHADH	ANTXR2
FBXO6		MCART6	C11ORF54
SRRM1		TCEB3	ZNF551
ANKRD58		S1PR3	ZNF555
BTN3A1		DOCK2	RNF157
UTP20		GRASP	EYA3
KREMEN1		ZNF616	ZFP42
TESK2		CYB561	ZNF496
CCDC107		ARNT2	EXOSC2
SLC2A11		KLRD1	AC090574.1
ADH6		TGM4	ACBD5
NCAM2		DKK3	LA16C-431H6.6
ACSL1		AFF2	GPC1
HNRNPH2		PPT1	GPC4
PSMB4		CRYAB	GPCPD1
LAG3		TMEM100	PDXDC1
FUBP3		PDE1C	FBXW8
SUN1		ZNF839	SLC40A1
ZNF248		RING1	SLC41A1
PITPNB		PSD	AC112693.2
POLR2D		CNTN5	GLUD1
ZNF74		NR2C2AP	MMP16
LIAS		C1orf52	RRP7A
FAM161B		LRAT	RRP8
ZNF707		SPTLC1	RS1
TBC1D20		SPOCK1	RSAD2
GRIA4		PADI1	RSF1
DUSP16		COL1A1	STARD4
ZNF732		RERGL	LRTOMT
SEPSECS		RNF183	LIX1L
XPO5		TMUB2	ESPN
CYP21A2		RND2	ESPNL
MID2		MTA2	ESR1
MEX3C		RSG1	AC093157.1
[truncated: 7,586 more rows]
